1 **Genotypic similarity among algal symbionts corresponds to associations with closely**  
2 **related coral hosts**

3

4 Hannah G. Reich<sup>1,2\*</sup>, Sheila A. Kitchen<sup>1,3\*</sup>, Kathryn H. Stankiewicz<sup>1</sup>, Meghann Devlin-Durante<sup>1</sup>,  
5 Nicole D. Fogarty<sup>4</sup>, Iliana B. Baums<sup>1\*</sup>

6

7 <sup>1</sup>Department of Biology, The Pennsylvania State University, University Park, PA 16801 USA

8 <sup>2</sup>Present address: Department of Biological Sciences, University of Rhode Island, Kingston, RI  
9 02881, USA

10 <sup>3</sup>Present address: Division of Biology and Biological Engineering, California Institute of  
11 Technology, Pasadena, CA 91125

12 <sup>4</sup>Department of Biology and Marine Biology, Center for Marine Science, University of North  
13 Carolina Wilmington, Wilmington, NC 28409

14

15 **Correspondence:** [hgreigh16@gmail.com](mailto:hgreigh16@gmail.com); [sak3097@caltech.edu](mailto:sak3097@caltech.edu); [baums@psu.edu](mailto:baums@psu.edu)

16 **Keywords:** Acropora, hybrid, niche diversification, single-nucleotide polymorphisms,  
17 Symbiodiniaceae, symbiosis

18 **Running title:** Allelic variation of an endangered coral symbiont

19

20 **Abstract**

21 Mutualisms where hosts are coupled metabolically to their symbionts often exhibit high partner  
22 fidelity. Most reef-building corals form obligate symbioses with specific species of  
23 photosymbionts, dinoflagellates in the family Symbiodiniaceae, despite needing to acquire

24 symbionts early in their development from environmental sources. Three Caribbean acroporids  
25 (*Acropora palmata*, *A. cervicornis*, and their hybrid *A. prolifera*) are geographically sympatric  
26 across much of their range in the greater Caribbean, but often occupy different depth and light  
27 habitats. Both species and their hybrid associate with *Symbiodinium 'fitti'*, a genetically diverse  
28 species of symbiont that is specific to these hosts. Since the physiology of the dinoflagellate  
29 partner is strongly influenced by light (and therefore depth), we investigated whether *S. 'fitti'*  
30 populations from each host source were differentiated genetically. We generated shallow genome  
31 sequences of acroporid colonies sampled from across the Caribbean. Single Nucleotide  
32 Polymorphisms (SNPs) among *S. 'fitti'* strains were identified by aligning sequences to a ~600  
33 Mb draft assembly of the *S. 'fitti'* genome, assembled from an *A. cervicornis* metagenome.  
34 Phylogenomic and multivariate analyses revealed that allelic variation among *S. 'fitti'* partitioned  
35 to each host species, as well as their hybrid, rather than by biogeographic origin. This is  
36 particularly noteworthy because the hybrid, *A. prolifera*, has a sparse fossil record and may be of  
37 relatively recent origin. Many of the SNPs putatively under selection were non-synonymous  
38 mutations predicted to alter protein efficiency. Differences in allele frequency among *S. 'fitti'*  
39 populations from each host taxon may correspond to distinct phenotypes that thrive in the  
40 different cellular environments found in each acroporid. The non-random sorting among  
41 genetically diverse strains, or genotypes, to different hosts could be the basis for lineage  
42 diversification via disruptive selection, leading to ecological specialization and ultimately  
43 speciation.

44

45 **Introduction**

46 Ecosystem services provided by coral-dinoflagellate mutualisms rival the contributions of  
47 other widely studied symbioses (ex: tubeworms and bacteria, yeast and termites, plant and  
48 fungi). In the coral-dinoflagellate mutualism, each partner benefits as the coral receives  
49 photosynthetic sugars from their dinoflagellate symbionts and the algal symbiont receives  
50 nutrients and protection in return (Trench 1979). Though decades of investigations have probed  
51 the causes and consequences of coral-algal dysbiosis (ex: coral bleaching), we are still gathering  
52 information on their basic biology (Cziesielski, Schmidt-Roach, & Aranda 2019). Specifically,  
53 little is known about the intraspecies level of co-evolutionary dynamics between host and their  
54 symbionts. The interdependence of the partners adds complexity to the system as each partner is  
55 selected in the context of the other.

56 Understanding the mechanisms that promote the apparent fidelity of reef-building corals  
57 towards one endosymbiotic dinoflagellate species (Symbiodiniaceae), despite having the  
58 opportunity to horizontally acquire symbionts, is important in light of rapid climate change. This  
59 is because the ability of corals to cope with heat stress by “shuffling” their endosymbiont  
60 communities to a more heat tolerant lineage (Little, Oppen, & Willis 2004; Silverstein, Cuning,  
61 & Baker 2017) may be limited. Corals have co-evolved with the Symbiodiniaceae since the  
62 Jurassic period (LaJeunesse et al. 2018) and, over time, may have become uniquely adapted to  
63 their symbionts (Goulet 2006; LaJeunesse et al. 2018; LaJeunesse et al. 2004; Lewis, Chan, &  
64 LaJeunesse 2019; Parkinson, Coffroth, & LaJeunesse 2015b; Thornhill, Fitt, & Schmidt 2006a).  
65 While juvenile corals often host several symbiont species, this community wanes over time to  
66 the dominant symbiont species (Abrego, Van Oppen, & Willis 2009; Coffroth, Goulet, & Santos  
67 2001; Poland & Coffroth 2017). This suggests that corals are most compatible with their  
68 dominant symbiont species and foreign pairings might be maladaptive, at least under current

69 conditions (Cunning, Gillette, Capo, Galvez, & Baker 2015; Pettay, Wham, Smith, Iglesias-  
70 Prieto, & LaJeunesse 2015).

71 A central question in coral reef science is whether coral-dinoflagellate symbioses can  
72 adapt to increasing sea surface temperatures over ecological time scales, especially if shuffling of  
73 symbiont partners is restricted (Goulet 2006). Genetic variation present within algal species has  
74 remained largely unstudied as a source that may fuel such adaptation (Buerger et al. 2020;  
75 Parkinson, Banaszak, Altman, LaJeunesse, & Baums 2015a). The potential for genetic variation  
76 within algal species to fuel adaptation to changing conditions can be assessed in the laboratory  
77 via experimental evolution experiments where algal strains are selected over several generations  
78 under heat stress conditions (Baker et al. 2018; Buerger et al. 2020; Chakravarti & van Oppen  
79 2018). In one instance, Symbiodiniaceae strains adapted to heat stress selection *in vitro* but once  
80 introduced into the coral partner, gains were not always retained highlighting the complexity of  
81 adaptation in the context of mutualistic partners (Buerger et al. 2020).

82 Alternatively, field studies may assess the long-term influence of selective factors such as  
83 a strong light gradient on the genetic variation of Symbiodiniaceae by taking advantage of depth  
84 stratification found in their coral hosts (Bongaerts et al. 2015a; Serrano et al. 2016). While  
85 sharing a geographic range, Caribbean *Acropora* species often differentiate across a depth and  
86 light gradient; *A. cervicornis* occupies a lower light habitat (~10 m depth) relative to its high-  
87 light dwelling (~3 m depth) sibling species *A. palmata* and their hybrid *A. prolifera* (~1 m depth;  
88 (Fogarty 2012; Goreau 1959; LaJeunesse 2002). All three taxa harbor the dinoflagellate  
89 endosymbiont *Symbiodinium 'fitti'* (ITS2 type A3), which is distinct from other *Symbiodinium*  
90 A3 lineages found in giant clams and other cnidarians (Kemp et al. 2015; Lee et al. 2015; Pinzón  
91 et al. 2015; Shoguchi et al. 2018). The variation of morphology between the three taxa ranges

92 from broad, moose antler branches to thinner, stag antler branches results in differences in the  
93 flow and light field within and around the colonies (Enríquez, Méndez, Hoegh-Guldberg, &  
94 Iglesias-Prieto 2017; Gladfelter 1983; Gladfelter 2007). Therefore, the persistence of *S. 'fitti'* in  
95 three host taxa at a range of depths across a large geographic region provides a unique  
96 opportunity to study how evolutionary history, geography, natural ecology, and biophysical  
97 parameters may contribute to adaptation and co-evolution in the coral holobiont.

98         The ecological and evolutionary dynamics between host and symbiont species are  
99 influenced by differences in their reproduction and dispersal strategies (Reviewed in Thornhill,  
100 Howells, Wham, Steury, & Santos 2017). Caribbean acroporid corals reproduce via production  
101 of meiotic, planktonic larvae and also disperse locally via fragmentation. Gene flow is restricted  
102 between eastern and western Caribbean region for *A. palmata* and *A. cervicornis* (Baums, Miller,  
103 & Hellberg 2005, 2006). Within each region, further population structure is observed but the  
104 specifics differ between species with *A. cervicornis* showing generally more fine-scale  
105 differentiation than *A. palmata* (Baums et al. 2005, 2006; Devlin-Durante & Baums 2017;  
106 Hemond & Vollmer 2010; Kitchen et al. 2019; Vollmer & Palumbi 2002, 2006). *A. palmata* and  
107 *A. cervicornis* have been present in the fossil record since the late Pliocene (~2.6-3.6 Mya)  
108 whereas the hybrid *A. prolifera* is mostly absent from the fossil record (Budd & Johnson 1999;  
109 McNeill, Budd, & Borne 1997; Precht, Vollmer, Modys, & Kaufman 2019). Although *A.*  
110 *prolifera* produces viable eggs and sperm, molecular analyses indicates that F2 adults are very  
111 rare or absent while backcrosses with either parent species occur occasionally (Kitchen et al.  
112 2020; Van Oppen, Willis, Vugt, & Miller 2000; Vollmer & Palumbi 2002).

113         The population structure and genotypic diversity of *S. 'fitti'* has received less attention  
114 and at a coarser level of genomic resolution (Baums et al. 2019; Baums, Devlin-Durante, &

115 LaJeunesse 2014; Thornhill et al. 2017). Despite that, higher levels of population genetic  
116 structure are documented in *S. 'fitti'* when compared to one of its hosts, *A. palmata* (Baums et al.  
117 2014). *S. 'fitti'* cells divide mitotically within the host and water column dispersal appears  
118 limited (Fitt & Trench 1983; Thornhill et al. 2017). Accordingly, the majority of Caribbean  
119 acroporids colonies host a single strain of *S. 'fitti'* and maintain long-term fidelity to that strain  
120 (Baums et al. 2014; O'Donnell, Lohr, Bartels, Baums, & Patterson 2018). However, sexual  
121 reproduction in Symbiodiniaceae has not been completely ruled out as a reproductive strategy  
122 because meiotic machinery has been detected in genomic data (Bellantuono, Dougan, Granados-  
123 Cifuentes, & Rodriguez-Lanetty 2019; Chi, Parrow, & Dunthorn 2014; Levin et al. 2016; Shah,  
124 Chen, Bhattacharya, & Chan 2020) and recombination is evident in population genetic data  
125 (Baums et al. 2014). These contrasting life-history strategies may contribute to the higher levels  
126 of population structure of *S. 'fitti'* compared to their acroporid hosts throughout the Caribbean  
127 (Baums et al. 2014; Thornhill et al. 2017).

128         Here, we describe fine-scale genetic differences in *S. 'fitti'* strains across its three host  
129 taxa spanning the geographic distribution of the mutualism. A draft *S. 'fitti'* genome assembly  
130 was constructed from *A. cervicornis* metagenomic sequences and compared to other  
131 Symbiodiniaceae genomic resources. Variation in genome-wide single nucleotide  
132 polymorphisms (SNPs) were investigated in *S. 'fitti'* and scanned for mutations that may change  
133 protein structure and function. Lastly, the potential biological and evolutionary ramifications of  
134 the allelic composition of *S. 'fitti'* are discussed.

135

## 136 **Methods**

137 *Sample Collection, Sequencing, and Assembly*

138 Tissue was collected for genome sequencing from 76 acroporids spanning the geographic  
139 distribution of *S. fitti* (Fig. 1, Table S1; Kitchen et al. 2019). High molecular weight DNA was  
140 isolated from each coral tissue sample using the Qiagen DNeasy kit (Qiagen, Valencia, CA)  
141 without prior enrichment for *S. fitti*. Of these samples, one specimen for each species from  
142 Florida (*A. cervicornis* CFL14120 and *A. palmata* PFL1012) was ‘deeply’ sequenced (~150x  
143 coverage; Kitchen et al. 2019). Paired-end short insert (550 nt) sequencing libraries of the two  
144 deeply sequenced samples were constructed with 1.8-2 µg sample DNA and the TruSeq DNA  
145 PCR-Free kit (Illumina, San Diego, CA). The remaining 74 paired-end short insert (350 nt)  
146 sequencing libraries were constructed using 100 ng sample DNA and the TruSeq DNA Nano kit  
147 (Illumina, San Diego, CA) with coverage between 8-40x (Kitchen et al. 2019). Deep- and  
148 shallow-sequence libraries were pooled separately and sequenced on either Illumina HiSeq 2500  
149 or HiSeq 4000 (Table S1, Illumina, San Diego, CA).

150 Sequencing adaptors and low-quality base calls (Phred score < 25) from the 3’ end of the  
151 deeply sequenced *A. cervicornis* metagenome reads were trimmed using cutadapt v 1.6 (Martin  
152 2011). After initial filtering, processed reads shorter than 50 bp were discarded and PCR  
153 duplicates removed using FastUniq v. 1.1 (Xu et al. 2012). A series of filtering steps were  
154 completed to identify the fraction of reads originating from *A. cervicornis* and *Symbiodinium*  
155 spp. First, a modified approach similar to Blobology, which compares sequence homology, read  
156 coverage and GC content, was performed (Kumar, Jones, Koutsovoulos, Clarke, & Blaxter  
157 2013). Contigs from a preliminary genome assembly created with SOAPdenovo2 v0.4  
158 (parameters -K 95 -R) were compared for homology against the coral *Acropora digitifera*  
159 (NCBI: GCF\_000222465.1) and symbiont *Breviolum minutum* (OIST: symbB.v1.0.genome.fa)  
160 genomes, and NCBI nucleotide database nt using megablast (evaluate 1e-5; Altschul et al. 1997;

161 Shinzato et al. 2011; Shoguchi et al. 2013). The sequence matches to the nt database for contigs  
162 that had no match to either coral or symbiont genome, were used to create a local contamination  
163 database to further screen the reads (Luo et al. 2015).

164 Reads were aligned with Bowtie2 v. 2.2.9 (parameters `-q -fast`; Langmead & Salzberg  
165 2012) consecutively to the *A. digitifera* mitochondria (KF448535.1), followed by a concatenated  
166 set of three Symbiodiniaceae genomes (*Symbiodinium microadriaticum*, *Breviolum minutum*,  
167 *Fugacium*; Aranda et al. 2016; Lin et al. 2015; Shoguchi et al. 2013), and the contamination  
168 database. This filtering step, however, only aligned 0.28% of the reads from *A. cervicornis* to the  
169 Symbiodiniaceae genomes. Reads that mapped to Symbiodiniaceae genomes (n=1,004,992) were  
170 extracted and assembled using SPADES v3.9.1 with a multi-kmer approach (`-k 21,33,55,77,99`)  
171 (Bankevich et al. 2012). The reads that aligned to the contamination database were assembled  
172 separately with SPADES v3.9.1 as described above, resulting in three additional contigs that  
173 matched Symbiodiniaceae genomes through blast homology.

174 The filtered *A. cervicornis* reads were assembled with SoapDeNovo v2, followed by six  
175 rounds of gap filling using GapCloser v1.12 and scaffolding using both SSPACE v2.0 (rounds 1,  
176 3, and 5) and LINKs v1.8.5 with *A. digitifera* scaffolds as the “long-reads” (`-t 2 -d 3000 -k 25`,  
177 round 2, 4 and 6) on alternate rounds (Boetzer & Pirovano 2014; Luo et al. 2015; Warren et al.  
178 2015). After the first three rounds and then each subsequent round, the contigs/scaffolds were  
179 partitioned to either coral or symbiont based on the top scoring match (lowest e-value) against a  
180 local blast database containing three Symbiodiniaceae genomes and five cnidarian genomes  
181 (*Hydra*, *Hydractinia*, *Nematostella*, *Exaiptasia*, *Acropora digitifera*). If the scaffolds equally  
182 matched cnidarian and symbiont sequences or did not match either they were retained in the  
183 coral fraction. Scaffolds identified as Symbiodiniaceae after the six rounds as well as those



184 assembled with SPADES above were combined. Two additional rounds of scaffolding with  
185 LINKS using *S. microadriaticum* as “long-reads” followed by SSPACE and gap filling with  
186 GapCloser were performed. To remove any remaining sequences matching cnidarian sequences,  
187 a final round of scaffold partitioning was performed by comparing the scaffolds against the  
188 *Acropora* spp. genomes: *A. digitifera* (Shinzato et al. 2011), *A. palmata* (Kitchen et al.  
189 unpublished; <http://baumslab.org/research/data>), *A. cervicornis* (Kitchen et al. unpublished), *A.*  
190 *hyacinthus* (Barshis et al. 2013), *A. tenuis* (Liew, Aranda, & Voolstra 2016); and *Symbiodinium*  
191 spp. genomes: *S. microadriaticum* (Aranda et al. 2016), and *S. tridacnidorum* (Shoguchi et al.  
192 2018).

193

#### 194 *Genome annotation and completeness*

195 Genes were predicted using Augustus v 3.2.3 (Stanke et al. 2006; Stanke, Steinkamp,  
196 Waack, & Morgenstern 2004). Each predicted gene in *S. 'fitti'* was queried against the NCBI nr,  
197 Uniprot SwissProt and trembl databases using blastx 2.6.0+ (max target seqs = 5, max hsps = 1,  
198 e-value = 1e-5; Altschul et al. 1997; Apweiler et al. 2004; Bairoch & Apweiler 1997; UniProt  
199 2014). Gene models were also compared to the *S. microadriaticum* gene and protein predictions  
200 (NCBI: GCA\_001939145.1) using blast (Altschul et al. 1997). To calculate assembly statistics  
201 and compare completeness to other Symbiodiniaceae genomes available at the time of analysis  
202 (*F. kawagutii*, *C. goreau*, *B. minutum*, *S. microadriaticum*, *S. tridacnidorum*), we compared our  
203 *S. 'fitti'* assembly and the aforementioned assemblies using an online version of CEGMA with  
204 the eukaryote ortholog set executed by gVolante (<https://gvolante.riken.jp>; Simão, Waterhouse,  
205 Ioannidis, Kriventseva, & Zdobnov 2015). Orthofinder v2.2.1 with default settings (Emms &

206 Kelly 2015) was used to identify unique and shared orthogroups between *S. 'fitti'* and six other  
207 Symbiodiniaceae species.

208

209 *S. 'fitti' infection status*

210 Presence of multiple *S. 'fitti'* strains within a coral host sample was determined using 12  
211 *S. 'fitti'* specific microsatellite loci as described by Baums et al. (2014). *S. 'fitti'* is haploid, thus  
212 samples with multiple alleles for any given *S. 'fitti'* microsatellite locus were deemed co-infected  
213 and removed from downstream analyses (Table S1).

214

215 *Variant detection and filtering*

216 For the purpose of SNP analyses, the *S. 'fitti'* genome assembly based on the *A.*  
217 *cervicornis* metagenome was used as a reference for variant calling of the deeply-sequenced *A.*  
218 *palmata* and all shallow genome samples (Table S1). The 47 shallow *S. 'fitti'* and 1 deep  
219 sequenced *A. palmata* “like” *S. 'fitti'* genome samples were aligned using BWA v0.7.15 (Li  
220 2013). Samtools v1.4 was used to remove PCR duplicates from the BAM file and alignment  
221 statistics were calculated using samtools *flagstat* (Table S1; Li et al. 2009). Variants were  
222 gathered using samtools *mpileup* using the `-u` `gAEf` and `-t` `AD,DP` flags and called using bcftools  
223 v1.4 using the haploid, `-f` `GQ`, and `-vmO` `z` flags (Li et al. 2009; Narasimhan et al. 2016). The  
224 bcftools (Li et al. 2009; Narasimhan et al. 2016) `-m2` `-M2` `-v` `snps` flags were used to separate  
225 SNPs from the output and the `-v` `indels` flag was used to remove indels from the output  
226 (Narasimhan et al. 2016). High-quality SNPs and indels were characterized as variants with a  
227 quality score over 200 and with no more than 20% of variant calls missing at a given site among

228 all samples (Danecek et al. 2011; Narasimhan et al. 2016). Only high-quality SNPs were used in  
229 subsequent analyses.

230

### 231 *Population structure*

232 The *psbA* minicircle was assembled from each sample to determine if the dominant algal  
233 partners amongst the three host taxa were all *S. 'fitti'*. The *psbA* minicircle in the *S. 'fitti'*  
234 genome assembly was identified through blast searches against three *psbA* sequences from NCBI  
235 (JN557866.1 = *Symbiodinium* type A3, JX094319.1 = *Breviolum minutum*, and AJ884898.1 = *B.*  
236 *faviinorum* (Barbrook, Visram, Douglas, & Howe 2006; Mungpakdee et al. 2014; Pochon,  
237 Putnam, Burki, & Gates 2012). The *psbA* minicircle for the remaining samples was assembled  
238 using two approaches. In the first approach, filtered and trimmed short-read sequences were  
239 mapped to *S. 'fitti'* *psbA* sequence (scaffold71443) using Bowtie 2 v2.3.4.1 (Langmead &  
240 Salzberg 2012) with the --sensitive mode parameter. Mapped reads were extracted using  
241 bedtools v2.26.0 (Quinlan & Hall 2010) and assembled using SPAdes v3.10.1 (Bankevich et al.  
242 2012) with various kmer sizes (-k 21, 33, 55, 77 and 99). In the second approach, the *de novo*  
243 organelle genome assembler NOVOplasty was used (Dierckxsens, Mardulyn, & Smits 2016).  
244 The *S. 'fitti'* genome *psbA* sequence was used as the seed sequence to extract similar sequences  
245 from the original, unfiltered reads for each sample. A consensus sequence from the two  
246 approaches for each sample was created after manual alignment of the sequences using MEGA6  
247 (Tamura, Stecher, Peterson, Filipinski, & Kumar 2013).

248 Phylogenomic patterns of *S. 'fitti'* allelic composition were determined using a subset of  
249 the high-quality SNPs without missing data with the RAxML-NG v. 0.9.0 GTR+FO+G  
250 nucleotide model (Stamatakis 2014). The tree topology with the lowest likelihood score is

251 presented with nodal support from 100 bootstrap replicates (Stamatakis 2014). Population  
252 structure was evaluated using STRUCTURE v2.3.4 for the 58,813 high-quality SNPs (Pritchard,  
253 Stephens, & Donnelly 2000). Additionally, the R package poppr v2.1.0 was used to determine  
254 the multilocus genotype of each strain using high quality SNPs with different genetic distance  
255 thresholds ranging 10-20% (See table S1; Kamvar, Tabima, & Grünwald 2014; Kitchen et al.  
256 2020) Clusters in multivariate space were detected using the *pca* function in PCAdapt (Luu,  
257 Bazin, & Blum 2017). An Analysis of Molecular Variance (AMOVA, poppr R package) was  
258 used for additional detection of population differentiation (Kamvar et al. 2014).

259

#### 260 *Determination of variants under selection*

261 Two different methods were used to identify candidate loci under selection. BayeScan v2.1 is a  
262 Bayesian method that incorporates uncertainty of allele frequencies between populations with  
263 small sample sizes (Fischer, Foll, Excoffier, & Heckel 2011; Foll, Fischer, Heckel, & Excoffier  
264 2010; Foll & Gaggiotti 2008). The default BayeScan settings were used for determining SNPs  
265 under selection when accounting for *S. fitti* host, location, and host\*location interactions.  
266 PCAdapt v4.0.3 was used to determine SNPs under selection without prior population  
267 information using the default settings (Knaus & Grünwald 2017). Outliers from BayeScan were  
268 determined as markers where FDR <0.05 and outliers from PCAdapt v4.0.3 were determined by  
269 q-values larger than the alpha value (0.05; Fischer et al. 2011; Foll et al. 2010; Foll & Gaggiotti  
270 2008; Knaus & Grünwald 2017). Outlier loci with a Bayes probability of 1 and q-value of 0  
271 which becomes infinite following logarithmic transformation and were removed from plotting.  
272 All statistics from SNPs under selection, their proximity to coding regions, sequence coverage,

273 and per SNP  $F_{ST}$  are in Tables S7 and S9. SnpEff v4.3 was used to predict downstream  
274 functional implications of all detected variants (De Baets et al. 2011).

275

#### 276 *Data and code availability*

277 Raw data is publicly available on NCBI under SRA project PRJNA473816. Code for data  
278 analysis and figure generation is available on github (<https://github.com/hgreich/Sfitti>).

279

## 280 **Results**

### 281 *Genome statistics and comparison to other Symbiodiniaceae*

282 The *Symbiodinium 'fitti'* assembly has a total nucleotide length of over 600 Mb  
283 (601,782,011 bp) and contains 274,185 contigs/scaffolds (*A. cervicornis*-*S. 'fitti'* CFL14120; Fig.  
284 1, Table S2). The *A. palmata*-*S. 'fitti'* (PFL1012) deeply-sequenced sample had 297,371,995  
285 reads map to the *A. cervicornis*-*S. 'fitti'* (CFL14120) reference (19% mapping rate, 8.5% paired  
286 reads, 4.2% singleton reads; Table S1). The shallow-sequenced genome samples with one *S.*  
287 *'fitti'* genotype had an average of 6,461,332 reads map to the reference (19.2% mapping rate,  
288 8.8% paired reads, 4.3% singleton reads; Table S1). The GC content and number of ambiguous  
289 bases were comparable to the *S. microadriaticum* assembly at 50.24% and 4.82%, respectively  
290 (Fig. 1, Table S2; Aranda et al. 2016). The genome completeness was assessed by the  
291 identification of the 248 core genes queried using the CEGMA program. The *S. 'fitti'* assembly  
292 had 55 complete proteins, 79 complete + partial proteins, and 169 missing proteins, which is  
293 comparable to the other Symbiodiniaceae assemblies queried (Table S2). The average number of  
294 orthologs per core gene was ~1.4 for the Symbiodiniaceae assemblies (Table S2). Gene  
295 prediction of *S. 'fitti'* assembly revealed 24,286 gene models, however, many were incomplete

296 (i.e., missing start or stop codon; Table S2, S3). In the gene family analysis, 3,368 orthogroups  
297 were found to be shared by the Symbiodiniaceae assemblies excluding *S. 'fitti'* whereas 2,982  
298 orthogroups were found to be shared by all Symbiodiniaceae assemblies (Fig. S1; including *S.*  
299 *'fitti'*). Additionally, 1,898 orthogroups were uniquely shared by *S. 'fitti'* and its closest relative  
300 *S. tridacnidorum* whereas 1,357 orthogroups were shared by the three assemblies from the genus  
301 *Symbiodinium* (Fig. S1). *S. 'fitti'* had 11 orthogroups that were not shared with any other  
302 Symbiodiniaceae assemblies.

303

#### 304 *Variation of the allelic composition of Symbiodinium 'fitti'*

305         Based on the analysis of *S. 'fitti'* specific microsatellite loci, the majority of shallow-  
306 sequenced samples harbored one strain of *S. 'fitti'* (n= 47, 75.9% of *A. palmata*-*S. 'fitti'* and  
307 82.6% of *A. cervicornis*- and *A. prolifera*-*S. 'fitti'*; Table S1) and were used for further analysis.  
308 A total of 2,505,230 SNPs and 569,337 indels were identified between all samples. Of these,  
309 58,538 SNPs and 1,874 indels were considered high-quality (Fig. 1). The 58,538 high-quality  
310 SNPs represent a range of per SNP fixation levels from 0 to 1 (Fig. S2). The Transition:  
311 Transversion ratio of the high-quality SNPs was 1.79 and did not vary by host species (Table  
312 S1). Of the high-quality SNPs, 12,780 (21.8%) occurred in coding regions (Table S4). The  
313 majority of the SNPs (87.5%) in coding regions matched other Symbiodiniaceae genomic  
314 resources (primarily the closely related species, *S. microadriaticum*). Multi-locus genotype  
315 (MLG) filtering of the 58,538 “high quality” SNPs indicated each sample represented a unique  
316 MLG (strain), consistent with the microsatellite analysis, and was retained for downstream  
317 analyses (Table S1). Additional filtering to remove variants with missing data resulted in 6,813  
318 high-quality SNPs, hereafter called conservative SNPs. After this procedure of quality filtering

319 SNPs and setting a stringent missing data threshold, the average read coverage increased from  
320 1.53 to 11.3 per SNP (Table S1; average 655.3% increase).

321

### 322 *Patterns of host-specificity and biogeography within S. 'fitti'*

323 The phylogeny of the *psbA* minicircle non-coding region revealed little differentiation  
324 between symbiont strains with respect to their host taxa, confirming that *S. 'fitti'* is one species  
325 (Fig. S2). The AMOVA corroborated that most of the variation among *S. 'fitti'* is at the within-  
326 species level (86.1+%; Table S5). Variation attributed to host species explained 11.6% of the  
327 components of covariance ( $\sigma^2 = 87.0$ ) and then variation among the geographic location of  
328 each host explained 2.3% of the components of covariance ( $\sigma^2 = 17.1$ ; Table S5). Variation  
329 among geographic locations explained a negative amount of the components of covariance (-  
330 5.4%,  $\sigma^2 = -39.3$ ) whereas variation among the host taxa at the various geographic locations  
331 explained 16.3% of the components of covariance ( $\sigma^2 = 117.6$ ; Table S5).

332 Consistent with the AMOVA results, samples clustered primarily by host taxon rather  
333 than geographic origins in a Principal Component Analysis (PCA) with the high-quality SNPs  
334 and in the Maximum Likelihood tree with the conservative SNPs (Figs. 2, 3). In the PCA, 16%  
335 of variance was explained by PC1 whereas 13.6% was explained by PC2 (Fig. 2). Within each  
336 host, there was some indication of biogeographic partitioning in the phylogeny but not in the  
337 PCA (Figs. 2, 3; Table S6). The *S. 'fitti'* associated with *A. prolifera* were found intermediate to  
338 the parental species in the Maximum Likelihood tree and clustered loosely together but were  
339 more similar to the *A. palmata S. 'fitti'* (Fig. 2). Analysis of STRUCTURE output using the  
340  $\Delta K$  method (Evanno, Regnaut, & Goudet 2005) identified three clusters as the most likely K  
341 (Table S6). The three clusters largely corresponded to host taxa (Fig. 4).

342

343 *SNPs under selection*

344       Of the high-quality SNPs, 4,987 (8.5%) were determined as selection outliers by  
345 PCAdapt (Fig. 5). When BayeScan accounted for host identity, location of host, and host by  
346 location interaction, 217, 5 and 197 selection outliers were identified, respectively (n= 370 SNPs;  
347 Fig. 5; Table S7). Additionally, 339 selection outlier SNPs were shared between the two  
348 programs (Fig. 5; Table S7). 103 outlier loci identified by BayeScan had a Bayes probability of 1  
349 and q-value of 0 which becomes infinite following logarithmic transformation and were therefore  
350 removed from the Manhattan plot (Fig. 5) but were reported in table S7. For each set of SNPs  
351 under selection, a subset was found in coding regions (899 from PCAdapt, 19 from BayeScan, 14  
352 from both callers; Table S7). The 14 outliers in coding regions that were shared by both callers  
353 were found in the coding regions of Putative cytosolic oligopeptidase, tankyrase-like proteins,  
354 alpha-agarase, and uncharacterized proteins (Table S7).

355

356 *Predicted functional implications of SNPs within S. 'fitti'*

357       Of all high-quality SNPs, SnpEff identified 60,373 modifier/non-coding variants  
358 (84.43%), 3,629 moderate/mostly harmless variants (5.08%), 7,451 low impact variants that  
359 might change protein efficiency/effectiveness (10.42%), and 51 highly disruptive SNPs (0.07%).  
360 Of the predicted mutations, SnpEff identified 3,644 non-synonymous mutations (32.87%), 32  
361 premature stop codon/nonsense mutations (0.29%), and 7,410 synonymous mutations (66.84%;  
362 Table S8). The aforementioned mutations are predicted to cause 11,086 codon changes and 3,676  
363 amino acid changes (Tables S8, S9). SnpEff predicted the 14 aforementioned outlier mutations



364 of Putative cytosolic oligopeptidase, tankyrase-like proteins, and alpha-agarase as modifier  
365 variants found in the introns (Tables S7-S10).

366

## 367 **Discussion**

368         The population dynamics and evolutionary history of reef-building corals are relatively  
369 well studied compared to the dinoflagellate symbionts they harbor. However, selection acts on  
370 both partners and differences in life-history characteristics between algae and corals suggest that  
371 the spatial and temporal scale of adaptation may differ. This would have consequences for our  
372 understanding of how they may adapt to rapidly changing climates. Genomic data of Caribbean  
373 acroporids reveals fine-scale population structure within the host taxa (Devlin-Durante & Baums  
374 2017; Kitchen et al. 2019; Kitchen et al. 2020). Previous analyses of microsatellite loci  
375 demonstrated that *S. 'fitti'* gene-flow scales were smaller than its host *Acropora palmata* (Baums  
376 et al. 2014), however, this study jointly analyzed SNP data from all three Caribbean acroporid  
377 host taxa. We showed that the allelic composition of sympatric *S. 'fitti'* populations are  
378 partitioned by host taxon and describe two potential scenarios that would lead to this result (Figs.  
379 2-4). Differentiation of *S. 'fitti'* by host taxon implies partner selectivity, which may be the result  
380 of coevolution (Scenario 1). Alternatively, coevolution and partner selectivity *per se* (i.e. via  
381 specific recognition of genetic variants among partners) may not explain the patterns of allelic  
382 variation. Differences in the micro-environment (light, depth, nutrient availability) associated  
383 with the habitat preferences of the host taxa may drive symbiont differentiation without specific  
384 recognition interactions or coevolution (Scenario 2). However, it is likely a combination of these  
385 mechanisms that drives the coevolution of *S. 'fitti'* strains within Caribbean acroporids. In either  
386 case, *S. 'fitti'* genetic diversity is tied to that of its endangered hosts.

387

388 *Host selectivity of symbiont strains in a horizontal symbiont transmission*

389 Broadcast spawning coral species acquire symbiotic partners horizontally each generation  
390 during the aposymbiotic larval stage (Baird, Guest, & Willis 2009). Thus, it is perplexing that  
391 coral lineages remain specific to a single symbiont strain, despite the potential to select a novel  
392 symbiont that might expand its physiological capacity and range of suitable habitats (Barneah,  
393 Weis, Perez, & Benayahu 2004; Chan, Lewis, Neely, & Baums 2019). Though initial intra-  
394 family, intra-genus, and intra-specific symbiont diversity is observed during early months of  
395 development, the diversity wanes and reverts to the dominant (adult) symbiont species shortly  
396 thereafter (Abrego et al. 2009; Poland & Coffroth 2017). Specificity between adult broadcast  
397 spawning corals and their symbionts is commonly observed at the species level with multi-  
398 marker and microsatellite approaches (Chan et al. 2019; LaJeunesse 2001; Lewis et al. 2019).  
399 Here, we add population genomic analyses using SNP data to reveal that sub-species level  
400 partitioning occurs between *S. 'fitti'* and its three Caribbean acroporid hosts (Figs. 2-4). Though  
401 adult colonies of Caribbean acroporids primarily associate with *S. 'fitti'*, they can occasionally  
402 harbor other genera of Symbiodiniaceae (*Breviolum* spp., *Durusdinium trenchii* and  
403 *Cladocopium* spp.), but these associations are often transitory and revert to *S. 'fitti'* over time  
404 (Baums, Johnson, Devlin-Durante, & Miller 2010; Thornhill, LaJeunesse, Kemp, Fitt, & Schmidt  
405 2006b).

406 The degree of selectivity of the cnidarian host when accepting a symbiotic partner likely  
407 has a role in maintaining the long-term specificity in these mutualisms. Host selectivity is in part  
408 modulated by cell recognition pathways such as lectin-glycan interactions and might contribute  
409 to the coevolution of *S. 'fitti'* and its respective host acroporids (Davy, Allemand, & Weis 2012;

410 Logan, LaFlamme, Weis, & Davy 2010; Parkinson et al. 2018; Weis, Reynolds, deBoer, &  
411 Krupp 2001; Wood-Charlson, Hollingsworth, Krupp, & Weis 2006). Though the *exact* role of  
412 cell-signaling in host selectivity has yet to be fully described, the specificity between partners is  
413 maintained by specialization pressures (LaJeunesse et al. 2018; Parkinson et al. 2018; Wood-  
414 Charlson et al. 2006). The ~160 million years following the widespread adaptive radiation of  
415 stony corals and Symbiodiniaceae has resulted in their current inter-dependence on one another  
416 (LaJeunesse et al. 2018). Consequently, the various symbiotic pairings remain adapted to meet  
417 the unique biochemical and metabolic demands of each host microenvironment (Barott, Venn,  
418 Perez, Tambutté, & Tresguerres 2015; Sogin, Anderson, Williams, Chen, & Gates 2014). The  
419 different morphologies and corallite structures possessed by each acroporid results in different  
420 light scattering properties and ultimately, light availability to the resident endosymbiont  
421 (Enriquez et al. 2017). These differences likely lead to strong selection pressures unique to each  
422 acroporid taxa. Ultimately, the specificity between *S. 'fitti'* strains and their acroporid hosts  
423 could be maintained by its ability (or lack thereof) to meet the metabolic needs of its host and  
424 adapt to the microenvironment created by its host.

425

#### 426 *The role of symbiont selectivity as a driver of S. 'fitti' intraspecific genomic variation*

427 Akin to role of host selectivity, that of the symbiont is also important for upholding  
428 partner specificity in symbioses. The diversity and abundance of Symbiodiniaceae in the water  
429 column is not necessarily proportional to their counterparts partaking in mutualisms with reef-  
430 building corals (Cunning, Yost, Guarinello, Putnam, & Gates 2016; Littman, van Oppen, &  
431 Willis 2008; Manning & Gates 2008). However, some lineages of Symbiodiniaceae possess the  
432 ability to establish symbiosis with non-coral invertebrates (Cunning et al. 2016; Decelle et al.

433 2018). The total diversity of *S. 'fitti'* likely spans beyond strains that inhabit acroporids and may  
434 incorporate free-living conspecifics living in the water column, sediments, etc. Therefore, the  
435 slight differences in allelic composition of each *S. 'fitti'* strain may be a result of the differential  
436 host preference of the available symbionts (Figs. 2-4). However, symbiotic *S. 'fitti'* strains might  
437 be attracted to the different microbial composition and abundance in the water column adjacent  
438 to a coral colony that constitute the 'ecosphere' surrounding each acroporid (Weber, González-  
439 Díaz, Armenteros, & Apprill 2019). Similarly, the food associated with each 'ecospheres' may  
440 attract different Symbiodiniaceae (Pollock et al. 2018; Weber et al. 2019). Putative intraspecific  
441 variation in the swimming availability and chemosensory responses of *S. 'fitti'* may also, in part,  
442 dictate which Symbiodiniaceae persist in each ecosphere (Fitt 1984; Fitt 1985; Fitt, Chang, &  
443 Trench 1981; Kamykowski, Reed, & Kirkpatrick 1992). Future experimental validation of  
444 intraspecific variation in *S. 'fitti'* swimming and chemosensory ability and how it pertains to  
445 selectivity of their acroporid hosts (and 'ecospheres') will shed light on how inter-partner  
446 specificity is maintained.

447

#### 448 *Coevolution as a driver of S. 'fitti' intraspecific genomic variation*

449 Coevolution is the process by which two interacting species reciprocally adapt to each  
450 other (sensu Janzen 1980). The coevolution of cnidarian-dinoflagellate mutualisms, in part, has  
451 resulted in the long-term fidelity between partners (Figs. 2-4; LaJeunesse et al. 2018; Stanley  
452 2006). Though the fossil record supports the coevolution of these mutualisms (Muscatine et al.  
453 2005; Stanley 2006), experimental follow up and verification has received far less attention.  
454 Advances in phylogenomics reveal extensive differentiation of genomic features and gene family  
455 enrichment when comparing symbiotic and free-living *Symbiodinium* spp., a potential byproduct

456 of coevolving with their hosts (González-Pech, Bhattacharya, Ragan, & Chan 2019a; González-  
457 Pech, Ragan, & Chan 2017; González-Pech et al. 2019b). Similarly, population genetic analyses  
458 of host and symbiont reveals widespread long-term partnerships between several cnidarian  
459 species and their endosymbiotic dinoflagellates, which might be the biproduct of coevolution  
460 (Baums et al. 2014; O'Donnell et al. 2018; Poland & Coffroth 2017; Thornhill et al. 2006a;  
461 Thornhill et al. 2017; Thornhill et al. 2006b). Therefore, the correspondence of the allelic  
462 variation of *S. 'fitti'* to its host acroporids is likely, in part, the result of coevolution. The  
463 STAGdb genotyping array (SNPchip) can be harnessed to experimentally verify the  
464 contributions of coevolution, host specificity, and symbiont selectivity to the evolutionary  
465 dynamics of *Acropora-S. 'fitti'* symbioses' (Kitchen et al. 2020).

466

#### 467 *The special case of the F1 coral hybrid as habitat*

468 The shared history (~2.6-3.6 million years of coexistence) between parents *A. palmata*  
469 and *A. cervicornis* with their symbiont, *S. 'fitti'* may have allowed sufficient time for co-  
470 evolutionary processes to play out (and so may help explain the strain differentiation of *S. 'fitti'*  
471 by host; Figs 2-4; Budd & Johnson 1999; McNeill et al. 1997). However, the situation differs for  
472 their first-generation hybrid, *A. prolifera*, which cannot directly respond to selection pressure  
473 from *S. 'fitti'* via differential successful sexual reproduction of its colonies because most are  
474 sterile (Vollmer & Palumbi 2002). Thus, any changes in the allele frequencies of *A. prolifera* are  
475 restricted to somatic mutations occurring within their lifetime which can be on the order of  
476 hundreds of years (Irwin et al. 2017). Though the fossil record of *A. prolifera* is rather sparse  
477 (McNeill et al. 1997), *S. 'fitti'* may have encountered these colonies over many thousands of

478 years as they are generated anew with each hybridization event. Thus, while a host co-adaptive  
479 response is unlikely, *S. 'fitti'* may have evolved strains that preferentially colonize *A. prolifera*.

480

#### 481 *Environmental differentiation as a driver of intraspecific genomic variation*

482 Environmental differences create variation in partner selectivity (Thrall, Hochberg,  
483 Burdon, & Bever 2007). *S. 'fitti'* population dynamics are confounded with differences in host  
484 habitat preferences including light, temperature, nutrient concentration, and food availability in  
485 the water column (Crossland & Barnes 1983; Miller 1995; Terraneo et al. 2019; Williams et al.  
486 2018). The inverse relationship between depth and light availability is a common driver of coral  
487 and Symbiodiniaceae zonation (Bongaerts et al. 2015a; Bongaerts et al. 2015b; Bongaerts et al.  
488 2017; Fogarty 2012; Goulet, Lucas, & Schizas 2019; LaJeunesse 2002; Serrano et al. 2014;  
489 Serrano et al. 2016). Throughout much of their distribution, Caribbean acroporid species reside  
490 in different habitats (Fogarty 2012; Goreau 1959). Specifically, *A. cervicornis* occupies a lower  
491 light habitat (~10m depth) relative to its high-light dwelling (~3m depth) sibling species *A.*  
492 *palmata* (Fogarty 2012; Goreau 1959; LaJeunesse 2002). Although the hybrid's depth  
493 distribution often overlaps with *A. palmata*, it can also be found in less than 1m of water  
494 (Fogarty 2012). Therefore, adaptation to different light availabilities may correspond to genomic  
495 differentiation between the shallow *A. palmata*- *S. 'fitti'* and *A. prolifera*- *S. 'fitti'* versus deep *A.*  
496 *cervicornis*- *S. 'fitti'* (Figs. 2-4; Finney et al. 2010; Kirk, Andras, Harvell, Santos, & Coffroth  
497 2009). Microenvironments created by light attenuation at depth may lead to range-limited  
498 dispersal of *S. 'fitti'* and modulate the available pool of symbionts (Finney et al. 2010; Serrano et  
499 al. 2016). Furthermore, the differences in the skeletal morphology of acroporids result in  
500 different light scattering properties that likely have profound effects on the light availability and

501 microenvironments for their resident *S. 'fitti'* (Enríquez et al. 2017; Gladfelter 1983; Gladfelter  
502 2007). The different light regimes, skeletal features and flow fields associated with each  
503 acroporid may exert some selection pressure on symbiont strains.

504

#### 505 *Genomic basis for extended phenotypes in S. 'fitti' - acroporid symbiosis*

506 The physiological capacity of the holobiont (coral and symbiont) hinges upon the specific  
507 partner pairings as well as external (environmental) drivers (Parkinson & Baums 2014). The  
508 large number of non-synonymous SNPs differentiating the *S. 'fitti'* strains among their hosts may  
509 demarcate the onset of eventual speciation (Fig. 5; Tables S7-10) although it is difficult to know  
510 what barriers to gene flow may exist that allow for such a process. Changes in amino acid  
511 sequences and protein efficiency resulting from these mutations may serve as the genomic basis  
512 causing intraspecific variation in physiological aptitude (Parkinson et al. 2015a; Parkinson &  
513 Baums 2014). Similarly, the candidate genes under selection identified by BayeScan and  
514 PCAdapt may underlie the strain differentiation by host species (Tables S7-10). Non-  
515 synonymous mutations in putative cytosolic oligopeptidase and alpha-agarase regions may result  
516 in the subtle alteration of zinc and calcium ion binding, respectively, which in turn likely  
517 contribute to variation in the physiological capacity of *S. 'fitti'* (Table S7-S10; Kmiec, Teixeira,  
518 Murcha, & Glaser 2016; Zhang et al. 2018). Further, these genotypic and phenotypic differences  
519 may facilitate the adaptation of each *S. 'fitti'* strain to the internal and external  
520 microenvironments associated with each host niche and meeting their metabolic and nutritional  
521 demands (Figs. 2-5; Tables S7-10; Hemond, Kaluziak, & Vollmer 2014; Muscatine, Porter, &  
522 Kaplan 1989; Reich, Rodriguez, LaJeunesse, & Ho 2020; Sogin et al. 2014).

523

524 *Conclusion*

525           We show here that the population genetic structure of *Symbiodinium 'fitti'* is, in part,  
526 explained by its host association. Because the host species occupy different habitats, we cannot  
527 yet disentangle the role of host versus depth as a potential driver of population genetic structure.  
528 However, the genomic resources for the *S. 'fitti'* - acroporid system described here can be used in  
529 future studies to determine whether, and to what degree, the observed variation of allelic  
530 composition is a result of host selectivity, symbiont selectivity, coevolution, environmental  
531 differentiation, or a combination of these mechanisms. The appreciation of population genetic  
532 structure and evolutionary dynamics of both coral holobiont partners will better inform the  
533 genomic underpinnings of their phenotypes and physiological capacity.

534

535 **Acknowledgements**

536 We thank the PSU genomics facility for assistance with library prep and sequencing. We thank  
537 Prof. Todd LaJeunesse for assistance with the *psbA* phylogeny. Funding for this project was  
538 supported by NSF-OCE-1537959 (to IBB) and NSF-OCE-1538469 (to NDF). HGR was  
539 supported through NSF-OCE-1636022 (to T. LaJeunesse). Permits for samples include Florida:  
540 CRF permit numbers CRF-2017-009, CRF-2017-012, NOAA FKNMS permit numbers FKNMS-  
541 2011-159-A4, FKNMS-2001-009, FKNMS-2014-148-A2, and FKNMS-2010-130-A, Belize:  
542 CITES Permit 0385, 7487 and 7488; Curacao: CITES Permit 16US784243/9 and  
543 12US784243/9; and USVI Department of planning and natural resources, Division of fish and  
544 wildlife DFW14017T.

545

546 **References**



- 547  
548 Abrego D., Van Oppen M., & Willis B. L. (2009) Onset of algal endosymbiont specificity varies  
549 among closely related species of *Acropora* corals during early ontogeny. *Molecular*  
550 *ecology* **18**, 3532-3543.
- 551 Altschul S. F., Madden T. L., Schäffer A. A., Zhang J., Zhang Z., Miller W., & Lipman D. J.  
552 (1997) Gapped BLAST and PSI-BLAST: a new generation of protein database search  
553 programs. *Nucleic acids research* **25**, 3389-3402.
- 554 Apweiler R., Bairoch A., Wu C. H., Barker W. C., Boeckmann B., Ferro S., . . . Magrane M.  
555 (2004) UniProt: the universal protein knowledgebase. *Nucleic acids research* **32**, D115-  
556 D119.
- 557 Aranda M., Li Y., Liew Y. J., Baumgarten S., Simakov O., Wilson M. C., . . . Voolstra C. R.  
558 (2016) Genomes of coral dinoflagellate symbionts highlight evolutionary adaptations  
559 conducive to a symbiotic lifestyle. *Scientific reports* **6**, 39734.
- 560 Baird A. H., Guest J. R., & Willis B. L. (2009) Systematic and biogeographical patterns in the  
561 reproductive biology of scleractinian corals. *Annual Review of Ecology, Evolution, and*  
562 *Systematics* **40**, 551-571.
- 563 Bairoch A., & Apweiler R. (1997) The SWISS-PROT protein sequence data bank and its  
564 supplement TrEMBL. *Nucleic acids research* **25**, 31-36.
- 565 Baker K. G., Radford D. T., Evenhuis C., Kuzhiumparam U., Ralph P. J., & Doblin M. A. (2018)  
566 Thermal niche evolution of functional traits in a tropical marine phototroph. *Journal of*  
567 *Phycology* **54**, 799-810.
- 568 Bankevich A., Nurk S., Antipov D., Gurevich A. A., Dvorkin M., Kulikov A. S., . . . Prjibelski  
569 A. D. (2012) SPAdes: a new genome assembly algorithm and its applications to single-  
570 cell sequencing. *Journal of Computational Biology* **19**, 455-477.

- 571 Barbrook A. C., Visram S., Douglas A. E., & Howe C. J. (2006) Molecular Diversity of  
572 Dinoflagellate Symbionts of Cnidaria: The psbA Minicircle of Symbiodinium. *Protist*  
573 **157**, 159-171.
- 574 Barneah O., Weis V. M., Perez S., & Benayahu Y. (2004) Diversity of dinoflagellate symbionts  
575 in Red Sea soft corals: mode of symbiont acquisition matters. *Marine Ecology Progress*  
576 *Series* **275**, 89-95.
- 577 Barott K. L., Venn A. A., Perez S. O., Tambutté S., & Tresguerres M. (2015) Coral host cells  
578 acidify symbiotic algal microenvironment to promote photosynthesis. *Proceedings of the*  
579 *National Academy of Sciences* **112**, 607-612.
- 580 Barshis D. J., Ladner J. T., Oliver T. A., Seneca F. O., Traylor-Knowles N., & Palumbi S. R.  
581 (2013) Genomic basis for coral resilience to climate change. *Proceedings of the National*  
582 *Academy of Sciences* **110**, 1387-1392.
- 583 Baums I. B., Baker A. C., Davies S. W., Grottoli A. G., Kenkel C. D., Kitchen S. A., . . . Shantz  
584 A. A. (2019) Considerations for maximizing the adaptive potential of restored coral  
585 populations in the western Atlantic. *Ecological Applications* **0**, e01978.
- 586 Baums I. B., Devlin-Durante M. K., & LaJeunesse T. C. (2014) New insights into the dynamics  
587 between reef corals and their associated dinoflagellate endosymbionts from population  
588 genetic studies. *Molecular ecology* **23**, 4203-4215.
- 589 Baums I. B., Johnson M. E., Devlin-Durante M. K., & Miller M. W. (2010) Host population  
590 genetic structure and zooxanthellae diversity of two reef-building coral species along the  
591 Florida Reef Tract and wider Caribbean. *Coral Reefs* **29**, 835-842.
- 592 Baums I. B., Miller M. W., & Hellberg M. E. (2005) Regionally isolated populations of an  
593 imperiled Caribbean coral, *Acropora palmata*. *Molecular ecology* **14**, 1377-1390.

- 594 Baums I. B., Miller M. W., & Hellberg M. E. (2006) Geographic variation in clonal structure in a  
595 reef-building Caribbean coral, *Acropora palmata*. *Ecological Monographs* **76**, 503-519.
- 596 Bellantuono A. J., Dougan K. E., Granados-Cifuentes C., & Rodriguez-Lanetty M. (2019) Free-  
597 living and symbiotic lifestyles of a thermotolerant coral endosymbiont display profoundly  
598 distinct transcriptomes under both stable and heat stress conditions. *Molecular ecology*  
599 **28**, 5265-5281.
- 600 Boetzer M., & Pirovano W. (2014) SSPACE-LongRead: scaffolding bacterial draft genomes  
601 using long read sequence information. *BMC Bioinformatics* **15**, 211.
- 602 Bongaerts P., Carmichael M., Hay K. B., Tonk L., Frade P. R., & Hoegh-Guldberg O. (2015a)  
603 Prevalent endosymbiont zonation shapes the depth distributions of scleractinian coral  
604 species. *Royal Society open science* **2**, 140297.
- 605 Bongaerts P., Frade P. R., Hay K. B., Englebert N., Latijnhouwers K. R., Bak R. P., . . . Hoegh-  
606 Guldberg O. (2015b) Deep down on a Caribbean reef: lower mesophotic depths harbor a  
607 specialized coral-endosymbiont community. *Scientific reports* **5**, 7652.
- 608 Bongaerts P., Riginos C., Brunner R., Englebert N., Smith S. R., & Hoegh-Guldberg O. (2017)  
609 Deep reefs are not universal refuges: Reseeding potential varies among coral species.  
610 *Science Advances* **3**.
- 611 Budd A. F., & Johnson K. G. (1999) Origination preceding extinction during late Cenozoic  
612 turnover of Caribbean reefs. *Paleobiology* **25**, 188-200.
- 613 Buerger P., Alvarez-Roa C., Coppin C. W., Pearce S. L., Chakravarti L. J., Oakeshott J. G., . . .  
614 van Oppen M. J. H. (2020) Heat-evolved microalgal symbionts increase coral bleaching  
615 tolerance. *Science Advances* **6**, eaba2498.

- 616 Chakravarti L. J., & van Oppen M. J. H. (2018) Experimental Evolution in Coral  
617        Photosymbionts as a Tool to Increase Thermal Tolerance. *Frontiers in Marine Science* **5**,  
618        227.
- 619 Chan A. N., Lewis C. L., Neely K. L., & Baums I. B. (2019) Fallen Pillars: The Past, Present,  
620        and Future Population Dynamics of a Rare, Specialist Coral-Algal Symbiosis. *Frontiers*  
621        *in Marine Science* **6**, 218.
- 622 Chi J., Parrow M. W., & Dunthorn M. (2014) Cryptic Sex in Symbiodinium (Alveolata,  
623        Dinoflagellata) is Supported by an Inventory of Meiotic Genes. *Journal of Eukaryotic*  
624        *Microbiology* **61**, 322-327.
- 625 Coffroth M. A., Goulet T. L., & Santos S. R. (2001) Early ontogenic expression of specificity in  
626        a cnidarian-algal symbiosis. *Mar Ecol Prog Ser* **222**.
- 627 Crossland C. J., & Barnes D. J. (1983) Dissolved nutrients and organic particulates in water  
628        flowing over coral reefs at Lizard Island. *Marine and Freshwater Research* **34**, 835-844.
- 629 Cunning R., Gillette P., Capo T., Galvez K., & Baker A. (2015) Growth tradeoffs associated with  
630        thermotolerant symbionts in the coral *Pocillopora damicornis* are lost in warmer oceans.  
631        *Coral Reefs* **34**, 155-160.
- 632 Cunning R., Yost D. M., Guarinello M. L., Putnam H. M., & Gates R. D. (2016) Variability of  
633        Symbiodinium Communities in Waters, Sediments, and Corals of Thermally Distinct  
634        Reef Pools in American Samoa. *PloS one* **10**, e0145099.
- 635 Cziesielski M. J., Schmidt-Roach S., & Aranda M. (2019) The past, present, and future of coral  
636        heat stress studies. *Ecology and Evolution* **9**, 10055-10066.
- 637 Danecek P., Auton A., Abecasis G., Albers C. A., Banks E., DePristo M. A., . . . Sherry S. T.  
638        (2011) The variant call format and VCFtools. *Bioinformatics* **27**, 2156-2158.

- 639 Davy S. K., Allemand D., & Weis V. M. (2012) Cell Biology of Cnidarian-Dinoflagellate  
640 Symbiosis. *Microbiology and Molecular Biology Reviews* **76**, 229-261.
- 641 De Baets G., Van Durme J., Reumers J., Maurer-Stroh S., Vanhee P., Dopazo J., . . . Rousseau F.  
642 (2011) SNPeffect 4.0: on-line prediction of molecular and structural effects of protein-  
643 coding variants. *Nucleic acids research* **40**, D935-D939.
- 644 Decelle J., Carradec Q., Pochon X., Henry N., Romac S., Mahé F., . . . de Vargas C. (2018)  
645 Worldwide Occurrence and Activity of the Reef-Building Coral Symbiont Symbiodinium  
646 in the Open Ocean. *Current Biology* **28**, 3625-3633.e3623.
- 647 Devlin-Durante M. K., & Baums I. B. (2017) Genome-wide survey of single-nucleotide  
648 polymorphisms reveals fine-scale population structure and signs of selection in the  
649 threatened Caribbean elkhorn coral, *Acropora palmata*. *PeerJ* **5**, e4077.
- 650 Dierckxsens N., Mardulyn P., & Smits G. (2016) NOVOPlasty: de novo assembly of organelle  
651 genomes from whole genome data. *Nucleic Acids Research* **45**, e18-e18.
- 652 Emms D. M., & Kelly S. (2015) OrthoFinder: solving fundamental biases in whole genome  
653 comparisons dramatically improves orthogroup inference accuracy. *Genome Biology* **16**,  
654 157.
- 655 Enríquez S., Méndez E. R., Hoegh-Guldberg O., & Iglesias-Prieto R. (2017) Key functional role  
656 of the optical properties of coral skeletons in coral ecology and evolution. *Proceedings of*  
657 *the Royal Society B: Biological Sciences* **284**, 20161667.
- 658 Evanno G., Regnaut S., & Goudet J. (2005) Detecting the number of clusters of individuals using  
659 the software STRUCTURE: a simulation study. *Molecular ecology* **14**, 2611-2620.
- 660 Finney J. C., Pettay D. T., Sampayo E. M., Warner M. E., Oxenford H. A., & LaJeunesse T. C.  
661 (2010) The Relative Significance of Host–Habitat, Depth, and Geography on the

- 662 Ecology, Endemism, and Speciation of Coral Endosymbionts in the Genus  
663 Symbiodinium. *Microbial Ecology* **60**, 250-263.
- 664 Fischer M. C., Foll M., Excoffier L., & Heckel G. (2011) Enhanced AFLP genome scans detect  
665 local adaptation in high-altitude populations of a small rodent (*Microtus arvalis*).  
666 *Molecular ecology* **20**, 1450-1462.
- 667 Fitt W. K. (1984) The role of chemosensory behavior of *Symbiodinium microadriaticum*,  
668 intermediate hosts, and host behavior in the infection of coelenterates and molluscs with  
669 zooxanthellae. *Marine Biology* **81**, 9-17.
- 670 Fitt W. K. (1985) CHEMOSENSORY RESPONSES OF THE SYMBIOTIC  
671 DINOFLAGELLATE SYMBIODINIUM MICROADRIATICUM (DINOPHYCEAE)1.  
672 *Journal of Phycology* **21**, 62-67.
- 673 Fitt W. K., Chang S. S., & Trench R. K. (1981) Motility patterns of different strains of the  
674 symbiotic dinoflagellate *Symbiodinium* (= *Gymnodinium*) *microadriaticum*  
675 (Freudenthal) in culture. *Bulletin of Marine Science* **31**, 436-443.
- 676 Fitt W. K., & Trench R. K. (1983) The relation of diel patterns of cell division to diel patterns of  
677 motility in the symbiotic dinoflagellate *Symbiodinium microadriaticum* Freudenthal in  
678 culture. *New Phytologist* **94**, 421-432.
- 679 Fogarty N. D. (2012) Caribbean acroporid coral hybrids are viable across life history stages.  
680 *Marine Ecology Progress Series* **446**, 145-159.
- 681 Foll M., Fischer M. C., Heckel G., & Excoffier L. (2010) Estimating population structure from  
682 AFLP amplification intensity. *Molecular ecology* **19**, 4638-4647.

- 683 Foll M., & Gaggiotti O. (2008) A Genome-Scan Method to Identify Selected Loci Appropriate  
684 for Both Dominant and Codominant Markers: A Bayesian Perspective. *Genetics* **180**,  
685 977-993.
- 686 Gladfelter E. H. (1983) Skeletal development in *Acropora cervicornis*. *Coral Reefs* **2**, 91-100.
- 687 Gladfelter E. H. (2007) Skeletal development in *Acropora palmata* (Lamarck 1816): a scanning  
688 electron microscope (SEM) comparison demonstrating similar mechanisms of skeletal  
689 extension in axial versus encrusting growth. *Coral Reefs* **26**, 883-892.
- 690 González-Pech R. A., Bhattacharya D., Ragan M. A., & Chan C. X. (2019a) Genome Evolution  
691 of Coral Reef Symbionts as Intracellular Residents. *Trends in Ecology & Evolution*.
- 692 González-Pech R. A., Ragan M. A., & Chan C. X. (2017) Signatures of adaptation and symbiosis  
693 in genomes and transcriptomes of *Symbiodinium*. *Scientific reports* **7**, 15021.
- 694 González-Pech R. A., Stephens T. G., Chen Y., Mohamed A. R., Cheng Y., Burt D. W., . . .  
695 Chan C. X. (2019b) Structural rearrangements drive extensive genome divergence  
696 between symbiotic and free-living *Symbiodinium*. *bioRxiv*,  
697 783902.
- 698 Goreau T. F. (1959) The ecology of Jamaican coral reefs I. Species composition and zonation.  
699 *Ecology* **40**, 67-90.
- 700 Goulet T. L. (2006) Most corals may not change their symbionts. *Marine Ecology Progress*  
701 *Series* **321**, 1-7.
- 702 Goulet T. L., Lucas M. Q., & Schizas N. V. (2019) *Symbiodiniaceae* Genetic Diversity and  
703 Symbioses with Hosts from Shallow to Mesophotic Coral Ecosystems. In: *Mesophotic*  
704 *Coral Ecosystems* (eds. Loya Y, Puglise KA, Bridge TCL), pp. 537-551. Springer  
705 International Publishing, Cham.

- 706 Hemond E. M., Kaluziak S. T., & Vollmer S. V. (2014) The genetics of colony form and  
707 function in Caribbean *Acropora* corals. *BMC Genomics* **15**, 1133.
- 708 Hemond E. M., & Vollmer S. V. (2010) Genetic diversity and connectivity in the threatened  
709 staghorn coral (*Acropora cervicornis*) in Florida. *PloS one* **5**, e8652-e8652.
- 710 Irwin A., Greer L., Humston R., Devlin-Durante M., Cabe P., Lescinsky H., . . . Baums I. B.  
711 (2017) Age and intraspecific diversity of resilient *Acropora* communities in Belize. *Coral*  
712 *Reefs* **36**, 1111-1120.
- 713 Janzen D. H. (1980) When is it coevolution?
- 714 Kamvar Z. N., Tabima J. F., & Grünwald N. J. (2014) Poppr: an R package for genetic analysis  
715 of populations with clonal, partially clonal, and/or sexual reproduction. *PeerJ* **2**, e281.
- 716 Kamykowski D., Reed R. E., & Kirkpatrick G. J. (1992) Comparison of sinking velocity,  
717 swimming velocity, rotation and path characteristics among six marine dinoflagellate  
718 species. *Marine Biology* **113**, 319-328.
- 719 Kemp D. W., Thornhill D. J., Rotjan R. D., Iglesias-Prieto R., Fitt W. K., & Schmidt G. W.  
720 (2015) Spatially distinct and regionally endemic Symbiodinium assemblages in the  
721 threatened Caribbean reef-building coral *Orbicella faveolata*. *Coral Reefs* **34**, 535-547.
- 722 Kirk N. L., Andras J. P., Harvell C. D., Santos S. R., & Coffroth M. A. (2009) Population  
723 structure of Symbiodinium sp. associated with the common sea fan, *Gorgonia ventalina*,  
724 in the Florida Keys across distance, depth, and time. *Marine Biology* **156**, 1609-1623.
- 725 Kitchen S. A., Ratan A., Bedoya-Reina O. C., Burhans R., Fogarty N. D., Miller W., & Baums I.  
726 B. (2019) Genomic Variants Among Threatened *Acropora* Corals. *G3:*  
727 *Genes|Genomes|Genetics* **9**, 1633.



- 728 Kitchen S. A., Von Kuster G., Kuntz K. L. V., Reich H. G., Miller W., Griffin S., . . . Baums I.  
729 B. (2020) STAGdb: a 30K SNP genotyping array and Science Gateway for Acropora  
730 corals and their dinoflagellate symbionts. *Scientific reports* **10**, 12488.
- 731 Kmiec B., Teixeira P. F., Murcha M. W., & Glaser E. (2016) Divergent evolution of the M3A  
732 family of metallopeptidases in plants. *Physiologia Plantarum* **157**, 380-388.
- 733 Knaus B. J., & Grünwald N. J. (2017) vcfr: a package to manipulate and visualize variant call  
734 format data in R. *Molecular Ecology Resources* **17**, 44-53.
- 735 Kumar S., Jones M., Koutsovoulos G., Clarke M., & Blaxter M. (2013) Blobology: exploring  
736 raw genome data for contaminants, symbionts and parasites using taxon-annotated GC-  
737 coverage plots. *Frontiers in Genetics* **4**, 237.
- 738 LaJeunesse T. C. (2001) Investigating the biodiversity, ecology, and phylogeny of  
739 endosymbiotic dinoflagellates in the genus *Symbiodinium* using the ITS region: in search  
740 of a “species” level marker. *Journal of Phycology* **37**, 866-880.
- 741 LaJeunesse T. C. (2002) Diversity and community structure of symbiotic dinoflagellates from  
742 Caribbean coral reefs. *Marine Biology* **141**, 387-400.
- 743 LaJeunesse T. C., Parkinson J. E., Gabrielson P. W., Jeong H. J., Reimer J. D., Voolstra C. R., &  
744 Santos S. R. (2018) Systematic Revision of Symbiodiniaceae Highlights the Antiquity  
745 and Diversity of Coral Endosymbionts. *Current Biology*.
- 746 LaJeunesse T. C., Thornhill D. J., Cox E. F., Stanton F. G., Fitt W. K., & Schmidt G. W. (2004)  
747 High diversity and host specificity observed among symbiotic dinoflagellates in reef  
748 coral communities from Hawaii. *Coral Reefs* **23**, 596-603.
- 749 Langmead B., & Salzberg S. L. (2012) Fast gapped-read alignment with Bowtie 2. *Nature*  
750 *methods* **9**, 357.

- 751 Lee S. Y., Jeong H. J., Kang N. S., Jang T. Y., Jang S. H., & Lajeunesse T. C. (2015)  
752 Symbiodinium tridacnidorum sp. nov., a dinoflagellate common to Indo-Pacific giant  
753 clams, and a revised morphological description of Symbiodinium microadriaticum  
754 Freudenthal, emended Trench & Blank. *European Journal of Phycology* **50**, 155-172.
- 755 Levin R. A., Beltran V. H., Hill R., Kjelleberg S., McDougald D., Steinberg P. D., & van Oppen  
756 M. J. H. (2016) Sex, scavengers, and chaperones: transcriptome secrets of divergent  
757 symbiodinium thermal tolerances. *Molecular biology and evolution*, msw119.
- 758 Lewis A. M., Chan A. N., & LaJeunesse T. C. (2019) New Species of Closely Related  
759 Endosymbiotic Dinoflagellates in the Greater Caribbean have Niches Corresponding to  
760 Host Coral Phylogeny. *Journal of Eukaryotic Microbiology*.
- 761 Li H. (2013) Aligning sequence reads, clone sequences and assembly contigs with BWA-MEM.  
762 *arXiv preprint arXiv:1303.3997*.
- 763 Li H., Handsaker B., Wysoker A., Fennell T., Ruan J., Homer N., . . . Genome Project Data  
764 Processing S. (2009) The Sequence Alignment/Map format and SAMtools.  
765 *Bioinformatics* **25**, 2078-2079.
- 766 Liew Y. J., Aranda M., & Voolstra C. R. (2016) Reefgenomics.Org - a repository for marine  
767 genomics data. *Database* **2016**.
- 768 Lin S., Cheng S., Song B., Zhong X., Lin X., Li W., . . . Morse D. (2015) The *Symbiodinium*  
769 *kawagutii* genome illuminates dinoflagellate gene expression and coral symbiosis.  
770 *Science* **350**, 691.
- 771 Little A. F., Oppen M. J., & Willis B. L. (2004) Flexibility in algal symbioses shapes growth in  
772 reef corals. *Science* **304**, 1492-1494.

- 773 Littman R. A., van Oppen M. J. H., & Willis B. L. (2008) Methods for sampling free-living  
774 Symbiodinium (zooxanthellae) and their distribution and abundance at Lizard Island  
775 (Great Barrier Reef). *Journal of Experimental Marine Biology and Ecology* **364**, 48-53.
- 776 Logan D. D. K., LaFlamme A. C., Weis V. M., & Davy S. K. (2010) FLOW-CYTOMETRIC  
777 CHARACTERIZATION OF THE CELL-SURFACE GLYCANS OF SYMBIOTIC  
778 DINOFLAGELLATES (SYMBIODINIUM SPP.)1. *Journal of Phycology* **46**, 525-533.
- 779 Luo R., Liu B., Xie Y., Li Z., Huang W., Yuan J., . . . Liu Y. (2015) SOAPdenovo2: an  
780 empirically improved memory-efficient short-read de novo assembler. *GigaScience* **4**,  
781 s13742-13015.
- 782 Luu K., Bazin E., & Blum M. G. B. (2017) pcadapt: an R package to perform genome scans for  
783 selection based on principal component analysis. *Molecular Ecology Resources* **17**, 67-  
784 77.
- 785 Manning M. M., & Gates R. D. (2008) Diversity in populations of free-living Symbiodinium  
786 from a Caribbean and Pacific reef. *Limnology and Oceanography* **53**, 1853.
- 787 Martin M. (2011) Cutadapt removes adapter sequences from high-throughput sequencing reads.  
788 *EMBnet. journal* **17**, 10-12.
- 789 McNeill D. F., Budd A. F., & Borne P. F. (1997) Earlier (late Pliocene) first appearance of the  
790 Caribbean reef-building coral *Acropora palmata*: Stratigraphic and evolutionary  
791 implications. *Geology* **25**, 891-894.
- 792 Miller M. W. (1995) Growth of a temperate coral: effects of temperature, light, depth, and  
793 heterotrophy. *Marine Ecology Progress Series* **122**, 217-225.

- 794 Mungpakdee S., Shinzato C., Takeuchi T., Kawashima T., Koyanagi R., Hisata K., . . . Shoguchi  
795 E. (2014) Massive Gene Transfer and Extensive RNA Editing of a Symbiotic  
796 Dinoflagellate Plastid Genome. *Genome biology and evolution* **6**, 1408-1422.
- 797 Muscatine L., Goiran C., Land L., Jaubert J., Cuif J.-P., & Allemand D. (2005) Stable isotopes  
798 ( $\delta^{13}\text{C}$  and  $\delta^{15}\text{N}$ ) of organic matrix  
799 from coral skeleton. *Proceedings of the National Academy of Sciences of the United*  
800 *States of America* **102**, 1525.
- 801 Muscatine L., Porter J. W., & Kaplan I. R. (1989) Resource partitioning by reef corals as  
802 determined from stable isotope composition. *Marine Biology* **100**, 185-193.
- 803 Narasimhan V., Danecek P., Scally A., Xue Y., Tyler-Smith C., & Durbin R. (2016)  
804 BCFtools/RoH: a hidden Markov model approach for detecting autozygosity from next-  
805 generation sequencing data. *Bioinformatics* **32**, 1749-1751.
- 806 O'Donnell K. E., Lohr K. E., Bartels E., Baums I. B., & Patterson J. T. (2018) *Acropora*  
807 *cervicornis* genet performance and symbiont identity throughout the restoration process.  
808 *Coral Reefs* **37**, 1109-1118.
- 809 Parkinson J. E., Banaszak A. T., Altman N. S., LaJeunesse T. C., & Baums I. B. (2015a)  
810 Intraspecific diversity among partners drives functional variation in coral symbioses.  
811 *Scientific reports* **5**, 15667.
- 812 Parkinson J. E., & Baums I. B. (2014) The extended phenotypes of marine symbioses: ecological  
813 and evolutionary consequences of intraspecific genetic diversity in coral-algal  
814 associations. *Frontiers in microbiology* **5**, 445.
- 815 Parkinson J. E., Coffroth M. A., & LaJeunesse T. C. (2015b) New species of Clade B  
816 *Symbiodinium* (Dinophyceae) from the greater Caribbean belong to different functional

- 817 guilds: *S. aenigmaticum* sp. nov., *S. antillogorgium* sp. nov., *S. endomadracis* sp. nov.,  
818 and *S. pseudominutum* sp. nov. *Journal of Phycology* **51**, 850-858.
- 819 Parkinson J. E., Tivey T. R., Mandelare P. E., Adpressa D. A., Loesgen S., & Weis V. M. (2018)  
820 Subtle Differences in Symbiont Cell Surface Glycan Profiles Do Not Explain Species-  
821 Specific Colonization Rates in a Model Cnidarian-Algal Symbiosis. *Frontiers in*  
822 *microbiology* **9**, 842.
- 823 Pettay D. T., Wham D. C., Smith R. T., Iglesias-Prieto R., & LaJeunesse T. C. (2015) Microbial  
824 invasion of the Caribbean by an Indo-Pacific coral zooxanthella. *Proceedings of the*  
825 *National Academy of Sciences of the United States of America* **112**, 7513-7518.
- 826 Pinzón J. H., Kamel B., Burge C. A., Harvell C. D., Medina M., Weil E., & Mydlarz L. D.  
827 (2015) Whole transcriptome analysis reveals changes in expression of immune-related  
828 genes during and after bleaching in a reef-building coral. *Royal Society Open Science* **2**.
- 829 Pochon X., Putnam H. M., Burki F., & Gates R. D. (2012) Identifying and characterizing  
830 alternative molecular markers for the symbiotic and free-living dinoflagellate genus  
831 Symbiodinium. *PloS one* **7**, e29816-e29816.
- 832 Poland D. M., & Coffroth M. A. (2017) Trans-generational specificity within a cnidarian–algal  
833 symbiosis. *Coral Reefs* **36**, 119-129.
- 834 Pollock F. J., McMinds R., Smith S., Bourne D. G., Willis B. L., Medina M., . . . Zaneveld J. R.  
835 (2018) Coral-associated bacteria demonstrate phylosymbiosis and cophylogeny. *Nature*  
836 *Communications* **9**, 4921.
- 837 Precht W. F., Vollmer S. V., Modys A. B., & Kaufman L. (2019) Fossil *Acropora*  
838 *prolifera* (Lamarck, 1816) reveals coral hybridization is not only a recent  
839 phenomenon. *Proceedings of the Biological Society of Washington* **132**, 40-55.

- 840 Pritchard J. K., Stephens M., & Donnelly P. (2000) Inference of population structure using  
841 multilocus genotype data. *Genetics* **155**, 945-959.
- 842 Quinlan A. R., & Hall I. M. (2010) BEDTools: a flexible suite of utilities for comparing genomic  
843 features. *Bioinformatics* **26**, 841-842.
- 844 Reich H. G., Rodriguez I. B., LaJeunesse T. C., & Ho T.-Y. (2020) Endosymbiotic  
845 dinoflagellates pump iron: differences in iron and other trace metal needs among the  
846 Symbiodiniaceae. *Coral Reefs*.
- 847 Serrano X., Baums I., O'Reilly K., Smith T., Jones R., Shearer T., . . . Baker A. (2014)  
848 Geographic differences in vertical connectivity in the Caribbean coral *Montastraea*  
849 *cavernosa* despite high levels of horizontal connectivity at shallow depths. *Molecular*  
850 *ecology* **23**, 4226-4240.
- 851 Serrano X., Baums I. B., Smith T. B., Jones R. J., Shearer T. L., & Baker A. C. (2016) Long  
852 distance dispersal and vertical gene flow in the Caribbean brooding coral *Porites*  
853 *astreoides*. *Scientific reports* **6**.
- 854 Shah S., Chen Y., Bhattacharya D., & Chan C. X. (2020) Sex in Symbiodiniaceae  
855 dinoflagellates: genomic evidence for independent loss of the canonical synaptonemal  
856 complex. *Scientific reports* **10**, 9792.
- 857 Shinzato C., Shoguchi E., Kawashima T., Hamada M., Hisata K., Tanaka M., . . . Satoh N.  
858 (2011) Using the *Acropora digitifera* genome to understand coral responses to  
859 environmental change. *Nature* **476**, 320-323.
- 860 Shoguchi E., Beedessee G., Tada I., Hisata K., Kawashima T., Takeuchi T., . . . Shinzato C.  
861 (2018) Two divergent Symbiodinium genomes reveal conservation of a gene cluster for  
862 sunscreen biosynthesis and recently lost genes. *BMC genomics* **19**, 458.

- 863 Shoguchi E., Shinzato C., Kawashima T., Gyoja F., Mungpakdee S., Koyanagi R., . . . Fujiwara  
864 M. (2013) Draft assembly of the *Symbiodinium minutum* nuclear genome reveals  
865 dinoflagellate gene structure. *Current Biology* **23**, 1399-1408.
- 866 Silverstein R. N., Cunning R., & Baker A. C. (2017) Tenacious D: *Symbiodinium* in clade D  
867 remain in reef corals at both high and low temperature extremes despite impairment. *The*  
868 *Journal of Experimental Biology*.
- 869 Simão F. A., Waterhouse R. M., Ioannidis P., Kriventseva E. V., & Zdobnov E. M. (2015)  
870 BUSCO: assessing genome assembly and annotation completeness with single-copy  
871 orthologs. *Bioinformatics* **31**, 3210-3212.
- 872 Sogin E. M., Anderson P., Williams P., Chen C.-S., & Gates R. D. (2014) Application of 1H-  
873 NMR Metabolomic Profiling for Reef-Building Corals. *PloS one* **9**, e111274.
- 874 Stamatakis A. (2014) RAxML version 8: a tool for phylogenetic analysis and post-analysis of  
875 large phylogenies. *Bioinformatics* **30**, 1312-1313.
- 876 Stanke M., Keller O., Gunduz I., Hayes A., Waack S., & Morgenstern B. (2006) AUGUSTUS:  
877 ab initio prediction of alternative transcripts. *Nucleic acids research* **34**, W435-W439.
- 878 Stanke M., Steinkamp R., Waack S., & Morgenstern B. (2004) AUGUSTUS: a web server for  
879 gene finding in eukaryotes. *Nucleic acids research* **32**, W309-W312.
- 880 Stanley G. D. (2006) Photosymbiosis and the Evolution of Modern Coral Reefs. *Science* **312**,  
881 857.
- 882 Tamura K., Stecher G., Peterson D., Filipski A., & Kumar S. (2013) MEGA6: molecular  
883 evolutionary genetics analysis version 6.0. *Molecular Biology and Evolution* **30**, 2725-  
884 2729.

- 885 Terraneo T. I., Fusi M., Hume B. C. C., Arrigoni R., Voolstra C. R., Benzoni F., . . . Berumen M.  
886 L. (2019) Environmental latitudinal gradients and host-specificity shape Symbiodiniaceae  
887 distribution in Red Sea Porites corals. *Journal of Biogeography* **46**, 2323-2335.
- 888 Thornhill D. J., Fitt W. K., & Schmidt G. W. (2006a) Highly stable symbioses among western  
889 Atlantic brooding corals. *Coral Reefs* **25**, 515-519.
- 890 Thornhill D. J., Howells E. J., Wham D. C., Steury T. D., & Santos S. R. (2017) Population  
891 genetics of reef coral endosymbionts (Symbiodinium, Dinophyceae). *Molecular ecology*  
892 **26**, 2640-2659.
- 893 Thornhill D. J., LaJeunesse T. C., Kemp D. W., Fitt W. K., & Schmidt G. W. (2006b) Multi-  
894 year, seasonal genotypic surveys of coral-algal symbioses reveal prevalent stability or  
895 post-bleaching reversion. *Marine Biology* **148**, 711-722.
- 896 Thrall P. H., Hochberg M. E., Burdon J. J., & Bever J. D. (2007) Coevolution of symbiotic  
897 mutualists and parasites in a community context. *Trends in Ecology & Evolution* **22**, 120-  
898 126.
- 899 Trench R. K. (1979) The cell biology of plant-animal symbiosis. *Annual Review of Plant*  
900 *Physiology* **30**, 485-531.
- 901 UniProt C. (2014) UniProt: a hub for protein information. *Nucleic acids research* **43**, D204-  
902 D212.
- 903 Van Oppen M. J. H., Willis B. L., Vugt H. V., & Miller D. J. (2000) Examination of species  
904 boundaries in the *Acropora cervicornis* group (Scleractinia, Cnidaria) using nuclear DNA  
905 sequence analyses. *Molecular ecology* **9**, 1363-1373.
- 906 Vollmer S. V., & Palumbi S. R. (2002) Hybridization and the Evolution of Reef Coral Diversity.  
907 *Science* **296**, 2023.



- 908 Vollmer S. V., & Palumbi S. R. (2006) Restricted Gene Flow in the Caribbean Staghorn Coral  
909 *Acropora cervicornis*: Implications for the Recovery of Endangered Reefs. *Journal of*  
910 *Heredity* **98**, 40-50.
- 911 Warren R. L., Yang C., Vandervalk B. P., Behsaz B., Lagman A., Jones S. J. M., & Birol I.  
912 (2015) LINKS: Scalable, alignment-free scaffolding of draft genomes with long reads.  
913 *GigaScience* **4**, 35.
- 914 Weber L., González-Díaz P., Armenteros M., & Apprill A. (2019) The coral ecosphere: A  
915 unique coral reef habitat that fosters coral-microbial interactions. *Limnology and*  
916 *Oceanography* **9999**, 1-16.
- 917 Weis V. M., Reynolds W. S., deBoer M. D., & Krupp D. A. (2001) Host-symbiont specificity  
918 during onset of symbiosis between the dinoflagellates *Symbiodinium* spp. and planula  
919 larvae of the scleractinian coral *Fungia scutaria*. *Coral Reefs* **20**, 301-308.
- 920 Williams G. J., Sandin S. A., Zgliczynski B. J., Fox M. D., Gove J. M., Rogers J. S., . . . Smith J.  
921 E. (2018) Biophysical drivers of coral trophic depth zonation. *Marine Biology* **165**, 60.
- 922 Wood-Charlson E. M., Hollingsworth L. L., Krupp D. A., & Weis V. M. (2006) Lectin/glycan  
923 interactions play a role in recognition in a coral/dinoflagellate symbiosis. *Cellular*  
924 *Microbiology* **8**, 1985-1993.
- 925 Xu H., Luo X., Qian J., Pang X., Song J., Qian G., . . . Chen S. (2012) FastUniq: a fast de novo  
926 duplicates removal tool for paired short reads. *PloS one* **7**, e52249.
- 927 Zhang W., Xu J., Liu D., Liu H., Lu X., & Yu W. (2018) Characterization of an  $\alpha$ -agarase from  
928 *Thalassomonas* sp. LD5 and its hydrolysate. *Applied Microbiology and Biotechnology*  
929 **102**, 2203-2212.
- 930

931 **Data availability**

932 Sequences are under NCBI SRA PRJNA473816. Code for data analysis and figure generation is  
933 available on github (<https://github.com/hgreich/Sfitti>).

934

935 **Author contributions**

936 Conceived the project: SAK, IBB, HGR. Obtained funding: IBB, NDF. Mentorship: IBB, SAK.

937 Field collections of corals: SAK, IBB, NDF. Molecular work: SAK, MDD. Bioinformatic

938 analyses: HGR, SAK, KHS. Wrote the paper: HGR, SAK, IBB, NDF, KHS.

939

940 **Tables**

941

942 Table S1: Sample information including host taxa, location, sampling depth, sequencing  
943 platform, and accession number. Per sample information on read counts, mapping rates, and SNP  
944 summary statistics are also included. Multi-locus genotypes from 12 microsatellite loci, 58,538  
945 “high quality” SNPs, and 6,813 “conservative” SNPs with no missing data are included.

946

947 Table S2: Genome assembly summary statistics for *Symbiodinium 'fitti'* sample PFL14120.

948

949 Table S3: Annotation information for the 24,000+ genes in *Symbiodinium 'fitti.'*

950

951 Table S4: Annotation information and selection outlier statistics for *Symbiodinium 'fitti'* SNPS  
952 (12,700) that are predicted to fall in coding regions.

953

954 Table S5: AMOVA of indicates that ~12% of *Symbiodinium 'fitti'* variation is due to host taxon  
955 whereas negative % variation is due to location.

956

957 Table S6: Summary statistics from Structure Harvester including the Evanno's *delta* K method  
958 which predicted three main clusters.

959

960 Table S7: Selection outlier statistics and per SNP summary statistics loci identified as selection  
961 outliers by BayeScan (370) and PCAdapt (4,987). 307 selection outlier SNPs were shared  
962 between the two programs.

963

964 Table S8: Summary statistics for the predicted downstream effects of SNPs (generated by the  
965 SnpEff program). 60,373 (84.43%) modifier/non-coding, 3,629 (5.08%) moderate/mostly  
966 harmless, 7,451 (10.42%) low impact variants that might change protein efficiency/effectiveness,  
967 and 51 (0.07%) highly disruptive SNPs were identified.

968

969 Table S9: Predicted downstream effects (SnpEff) and annotation information for variants in  
970 coding regions.

971

972 Table S10: Predicted downstream effects (SnpEff) and annotation information for 12 variants in  
973 coding regions that were identified as selection outliers by both PCAdapt and BayeScan.

974

975 **Figures**

976

## Distribution of *Symbiodinium 'fitti'* samples

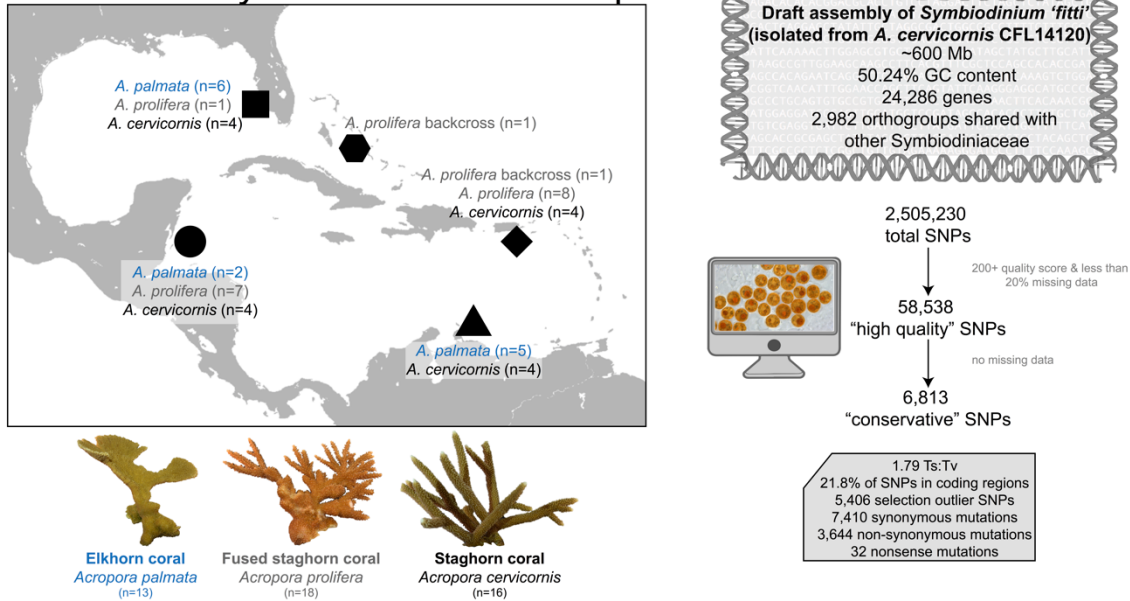

977

978 Fig. 1: Sampling design and summary statistics of population genomic approach used to  
 979 characterize *Symbiodinium 'fitti'* across three coral hosts. *Acropora palmata* (n = 13), *Acropora*  
 980 *cervicornis* (n = 16), and *Acropora prolifera* (n = 18) samples used for shallow genome  
 981 sequencing spanned their geographic distribution. Summary statistics for the 'deeply-sequenced'  
 982 CFL 14120 *A. cervicornis* – *S. 'fitti'* draft genome assembly including overall length, %GC  
 983 content, # of genes, and shared gene families with other Symbiodiniaceae. Summary statistics  
 984 and visual depiction of quality filtering work flow that was employed to identify high quality  
 985 variants and those that are under selection. Coral images from N. Fogarty and I. Baums.

986

987

988

989

990

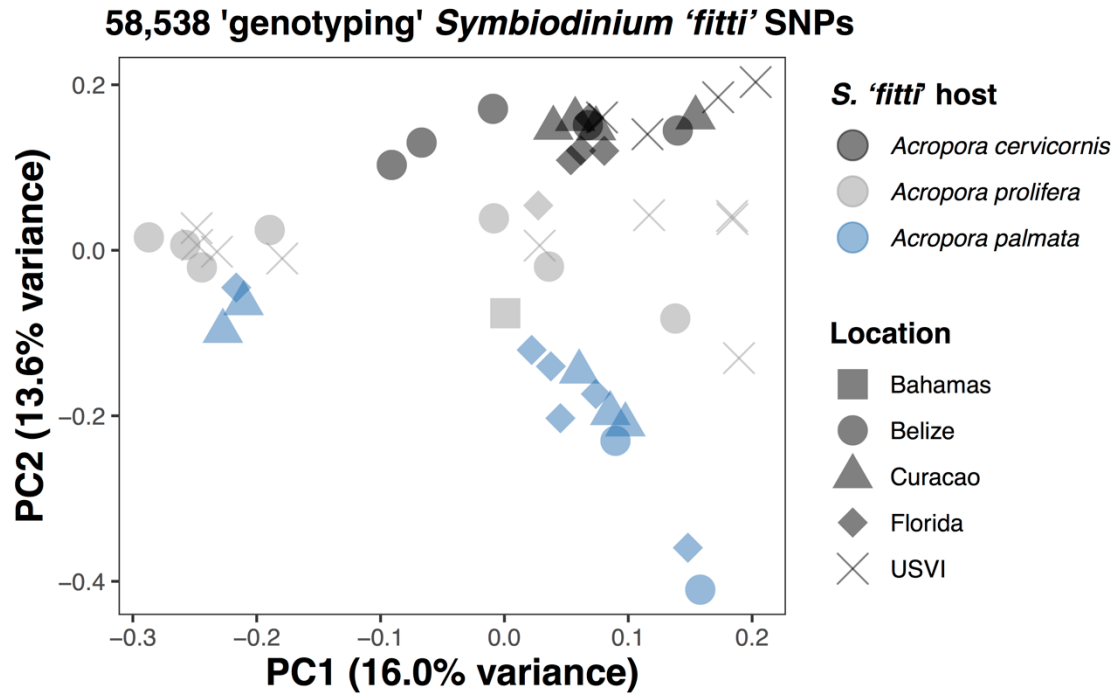

991

992 Fig. 2: Principal component analysis (PCA) of 58,583 genotyping *Symbiodinium* 'fitti' SNPs

993 illustrates genomic differentiation by host taxon. Coral images from N. Fogarty and I. Baums.

994

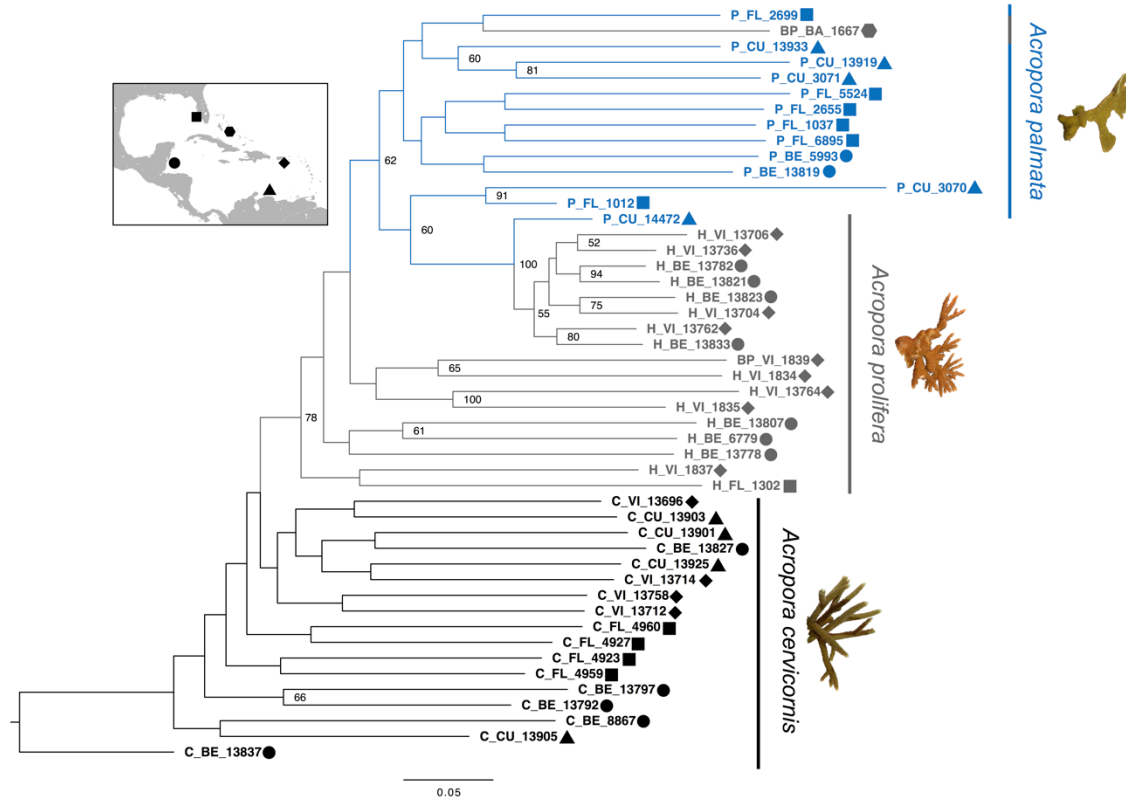

Fig. 3: Allelic composition of *Symbiodinium fitti* is at the sub-species level. RAxML (Maximum Likelihood) phylogeny of 6,813 “conservative” genotyping *S. fitti* SNPs without missing data and 100 bootstrap replicates illustrate *S. fitti* genomic differentiation by host taxon.

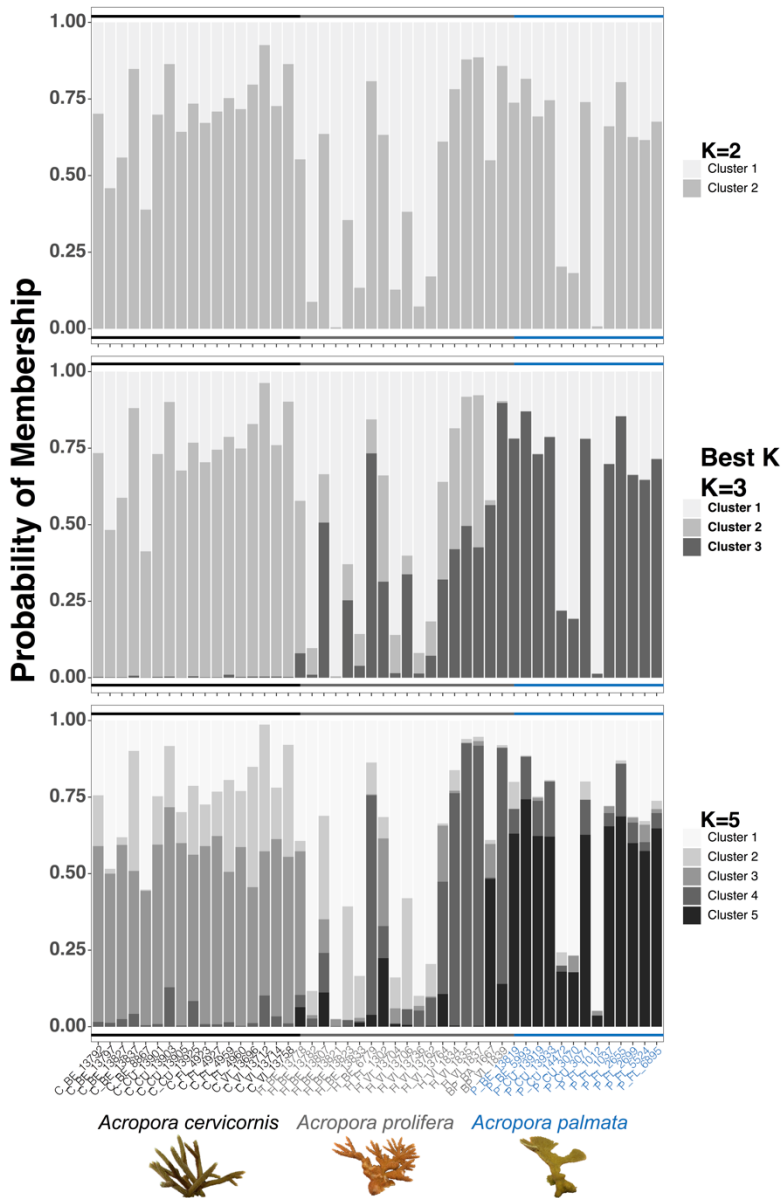

1008

1009 Fig. 4: *Symbiodinium 'fitti'* strain population assignment aligns with host taxon. Probability of

1010 membership predicted by STRUCTURE for 58,583 “high quality” *Symbiodinium 'fitti'* SNPS.

1011 K=3 was determined as best K. K=2 and K=5 are also presented for comparison. These results

1012 illustrate that *S. 'fitti'* membership clusters largely correspond to their host acroporid taxon.

1013 Coral images from N. Fogarty and I. Baums.

1014

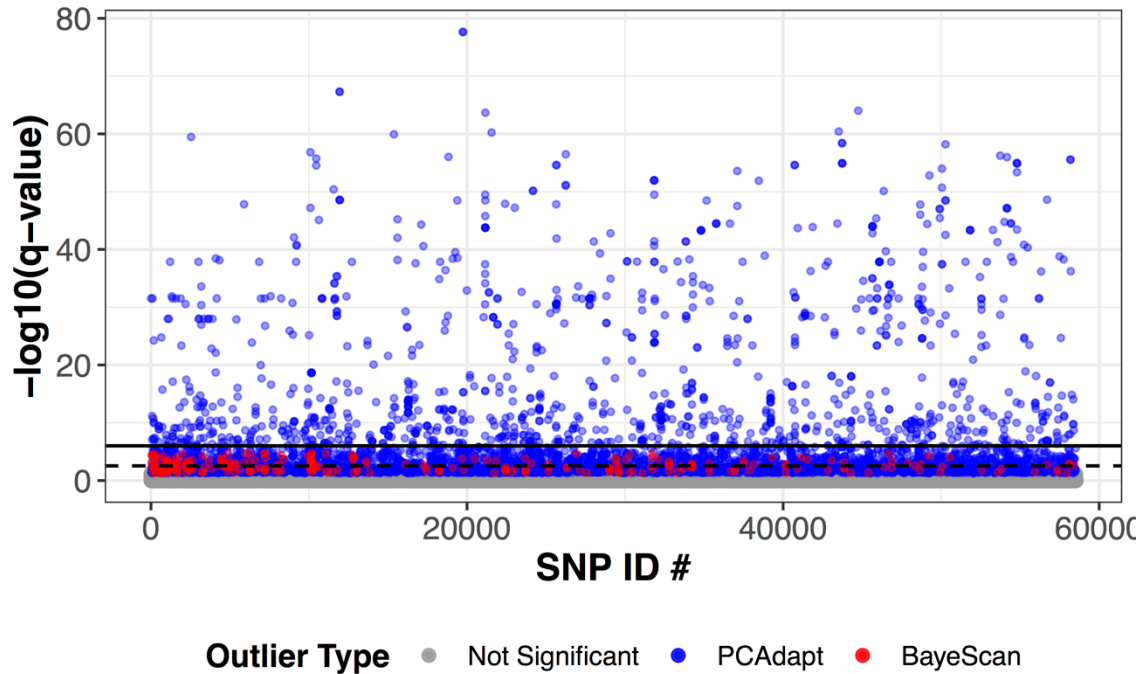

1015

1016 Fig. 5: Genetic variants of *S. fitti* showing signatures of selection. Manhattan plot of  $-\log_{10}$   
1017 transformed q-values for 58,583 genotyping SNPs. SNPs are highlighted by outlier detection  
1018 program (PCAdapt loci highlighted in blue; BayeScan loci highlighted in red). 339 selection  
1019 outlier SNPs were shared between the two programs. 103 outlier loci identified by BayeScan had  
1020 a Bayes probability of 1 and q-value of 0 which becomes infinite following logarithmic  
1021 transformation and were therefore removed from the plot. These loci were also had high  
1022 BayeScan fixation levels between host and location. The dashed line represents the 5% FDR  
1023 adjustment threshold (2.54) and whereas the solid line represents the 0.05 Bonferroni correction  
1024 threshold (6.01).

1025

1026

1027

1028



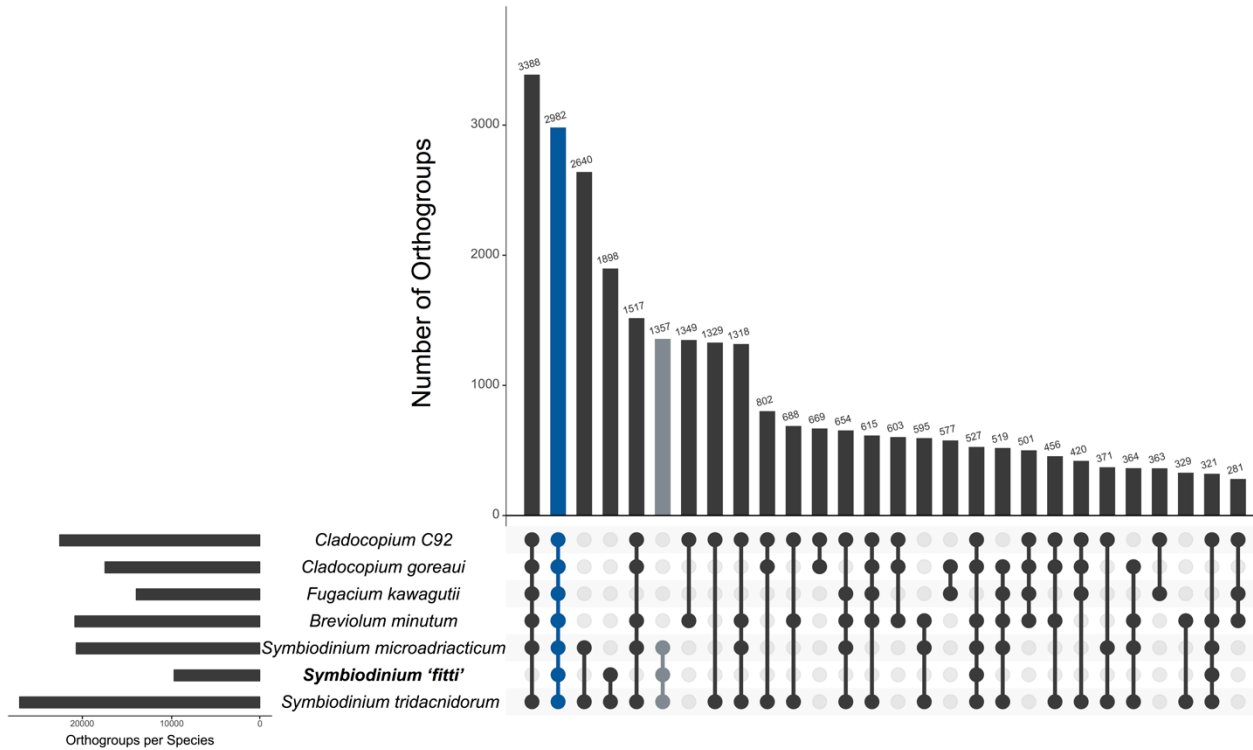

1029

1030 Fig. S1: Gene families shared between different Symbiodiniaceae lineages (including

1031 *Symbiodinium 'fitti'*).

1032

1033

1034

1035

1036

1037

1038

1039

1040

1041

1042

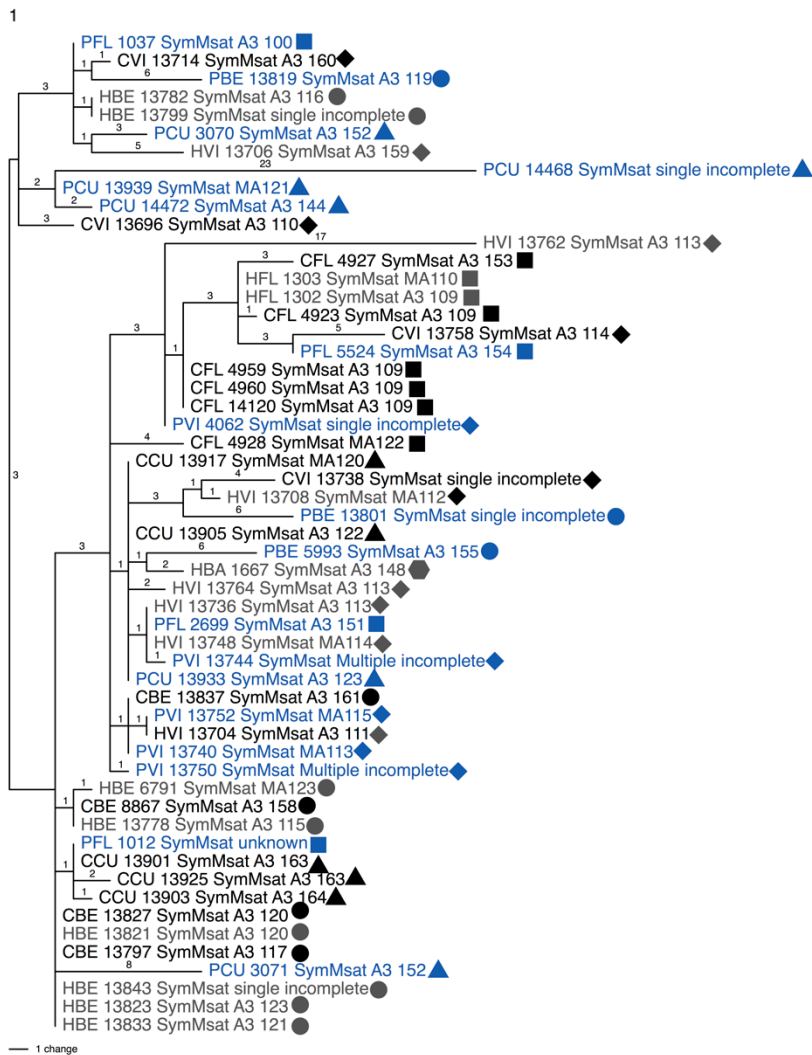

1043

1044 Fig. S2: Intragenomic variation of *Symbiodinium 'fitti'* is at the sub-species level. Phylogeny of  
1045 the *psbA* non-coding region, a commonly used marker used to help delimit *Symbiodinium* species  
1046 indicates that *S. 'fitti'* in its three different hosts are all one species.

1047

1048

1049

1050

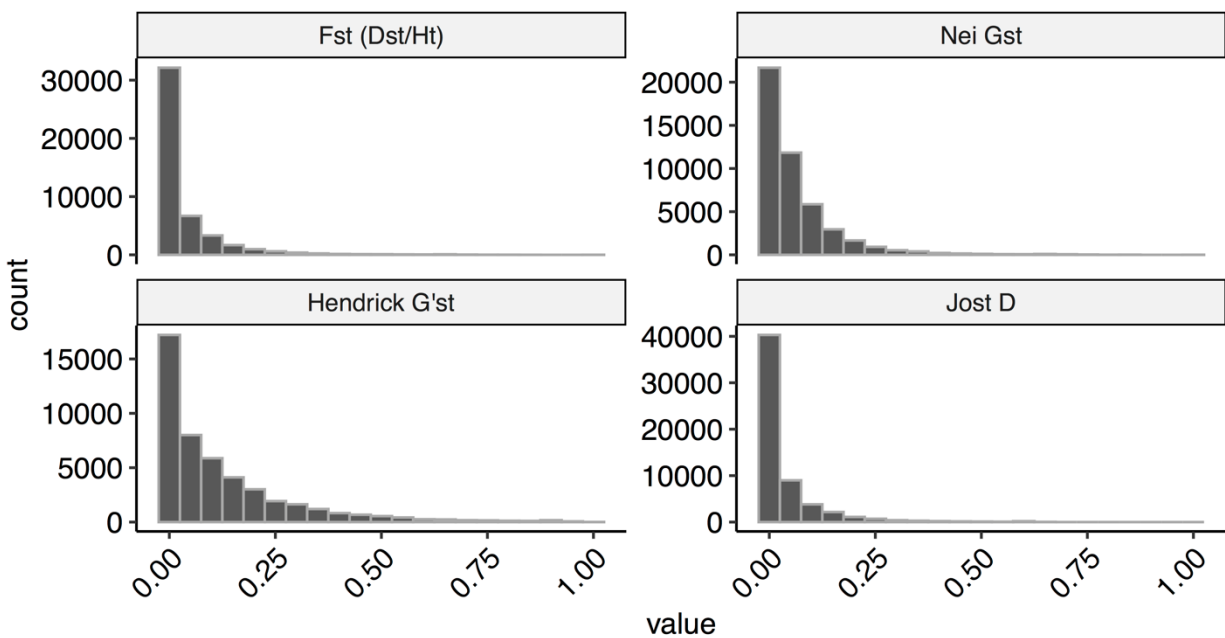

1051

1052 Fig. S3: Histogram of per SNP fixation levels for 58,538 genotyping SNPs.
